# Supplementary material for: Ruthenium catalysed one-pot synthesis of S-allyl and cinnamyl dithiocarbamates using allyl and cinnamyl acetates in water
Source: Royal Society of Chemistry journal article supplement (doi:10.1039/c2ra20856c), 2012-01-01
Supplement: c2ra20856c.pdf [file c2ra20856c.pdf]

## Supplementary Information

### **Ruthenium catalysed one-pot synthesis of S-allyl and cinnamyl dithiocarbamates using allyl and cinnamyl acetates in water**

Sabir Ahammed, Amit Saha, and Brindaban C. Ranu\*

| <b>Contents</b>                                                                                           | <b>Page no.</b> |
|-----------------------------------------------------------------------------------------------------------|-----------------|
| 1. Copies of $^1\text{H}$ NMR and $^{13}\text{C}$ NMR of all products in Table 2                          | 2-21            |
| 2. X-Ray Structure of ( <i>E</i> )-3-(thiophen-2-yl)allyl pyrrolidine-1-carbodithioate (Table 2 entry 16) | 22-23           |

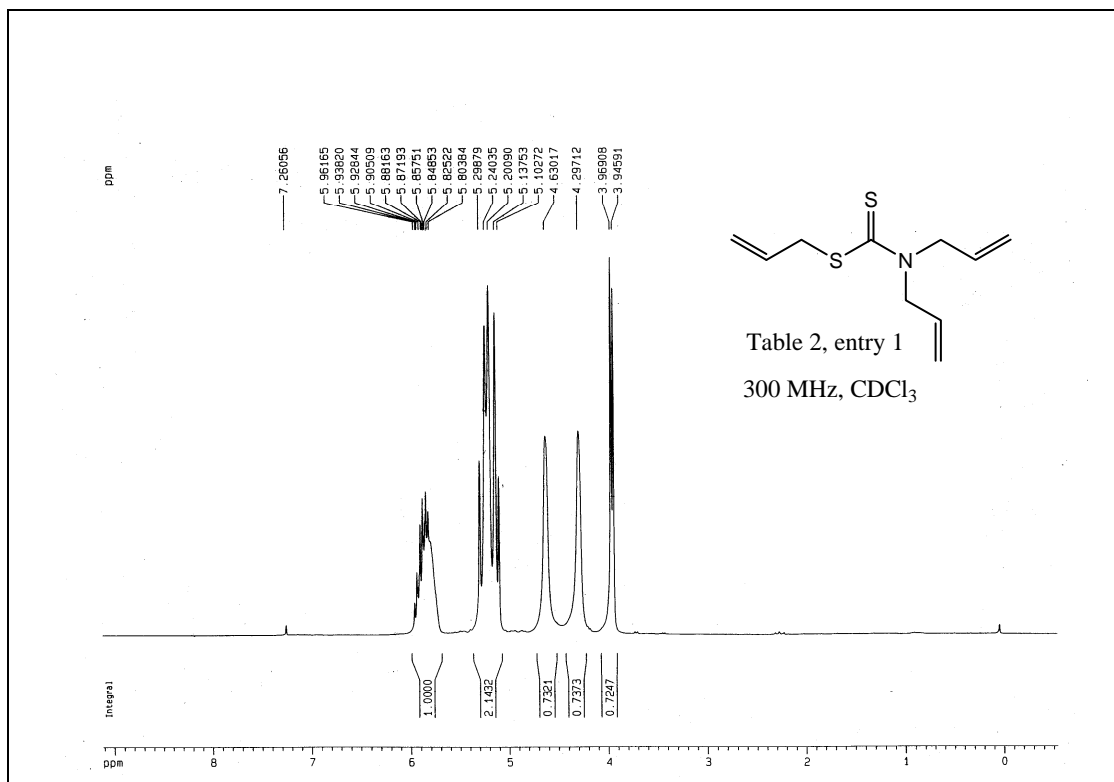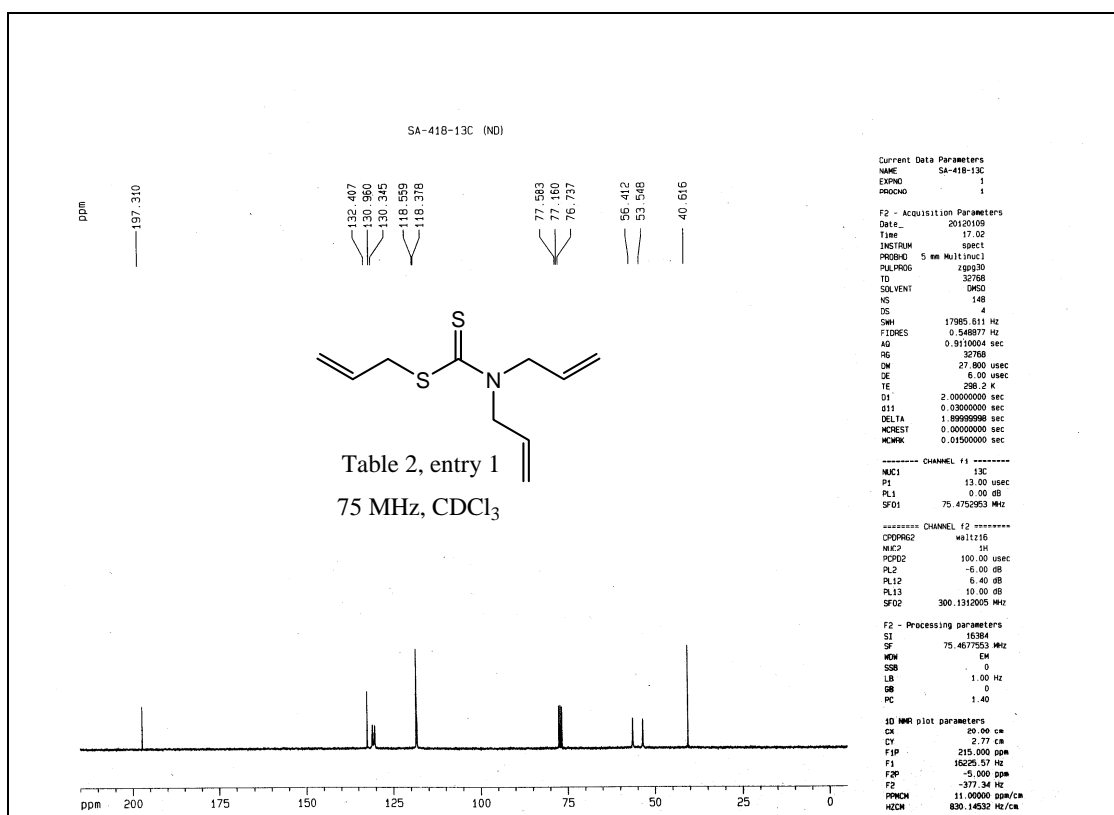

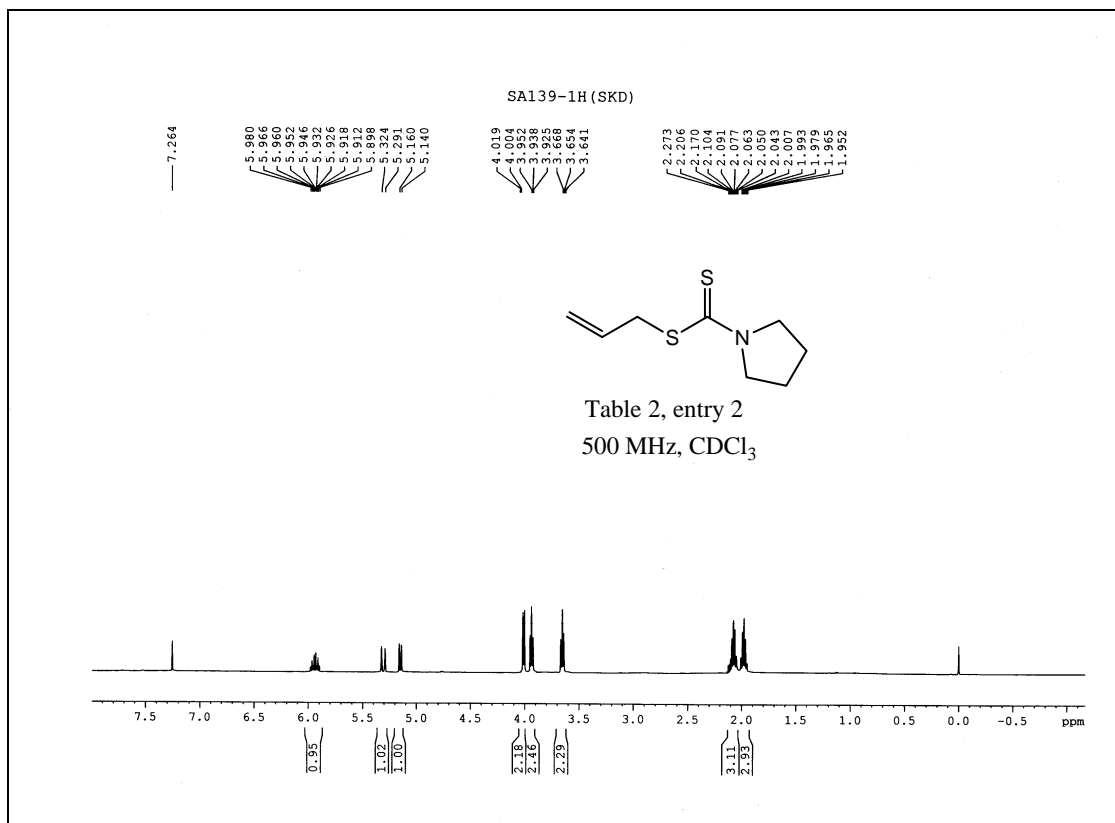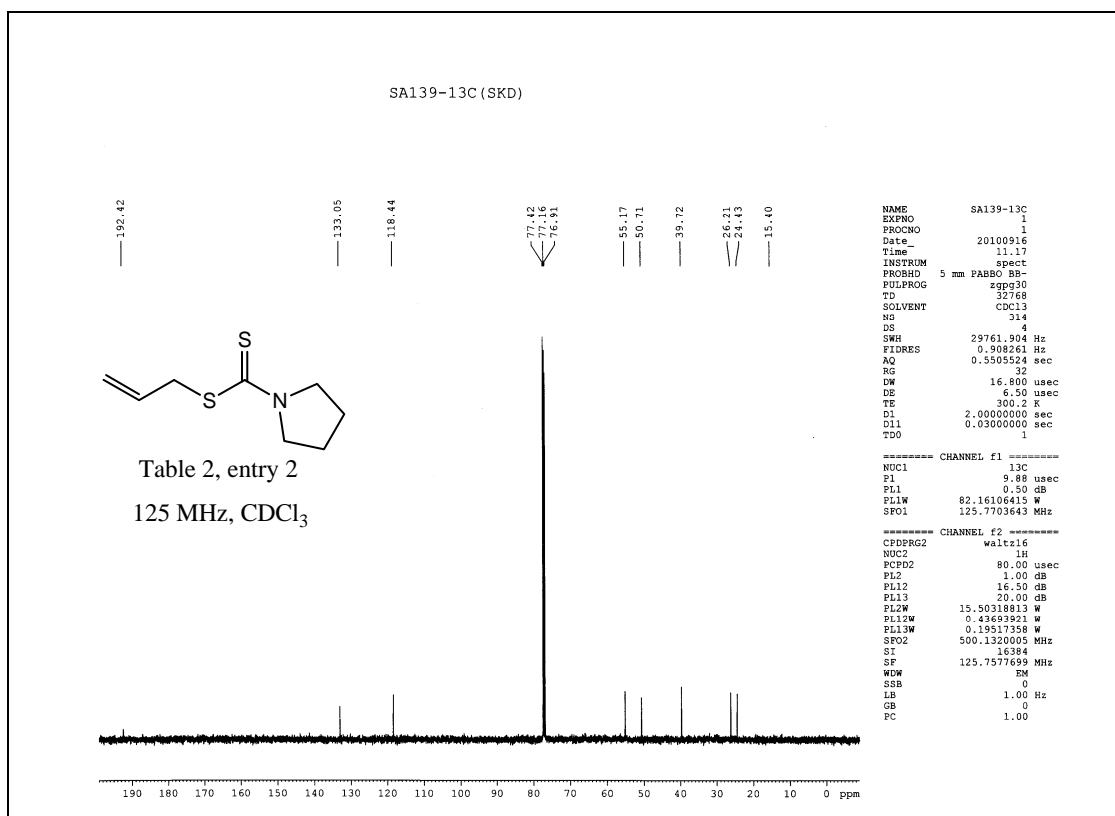

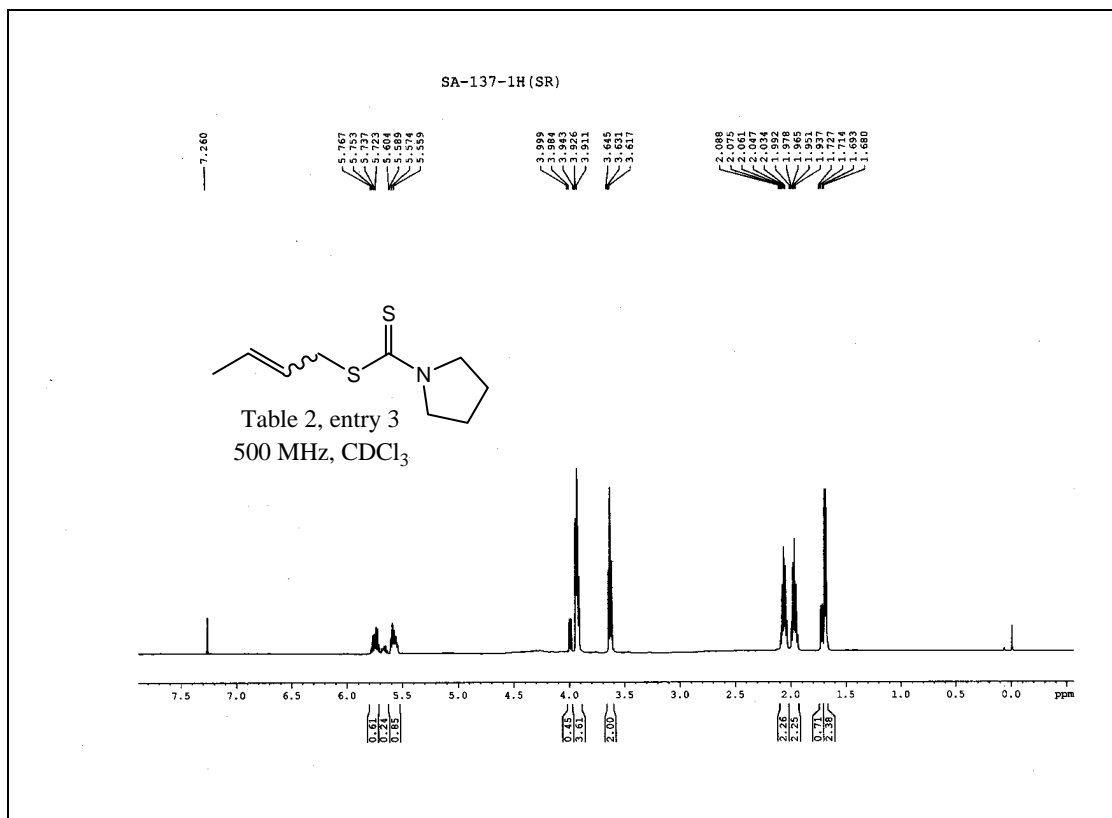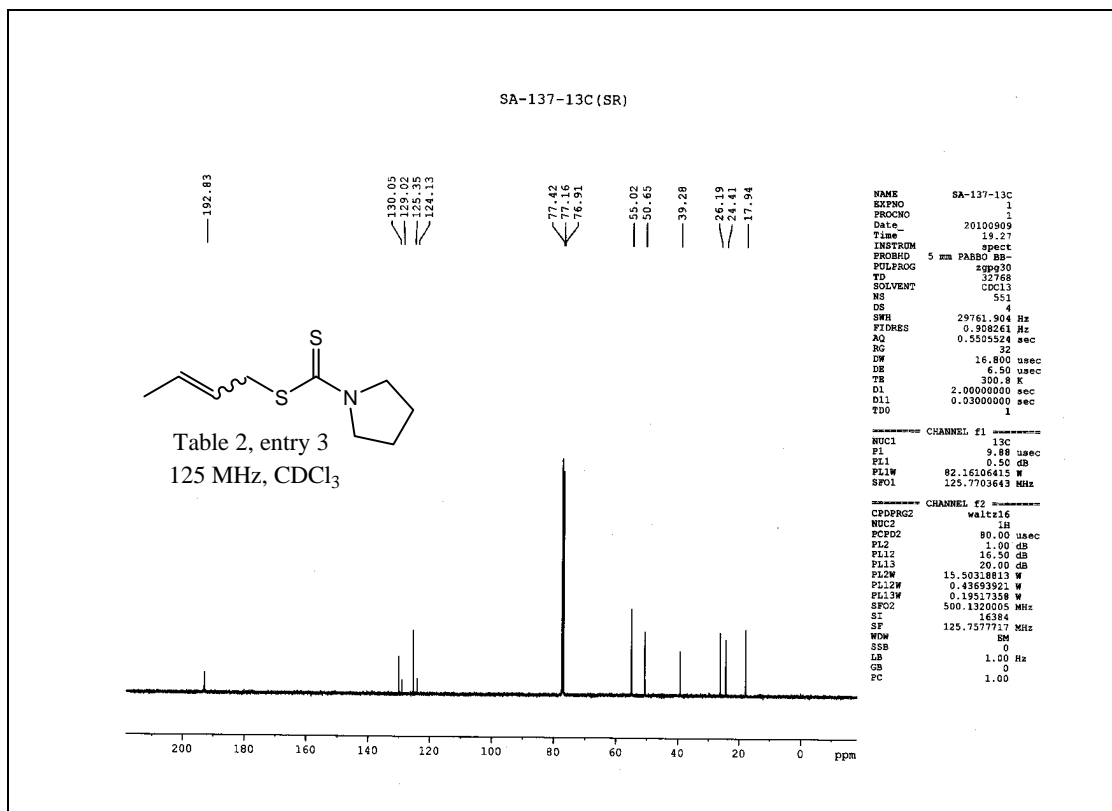

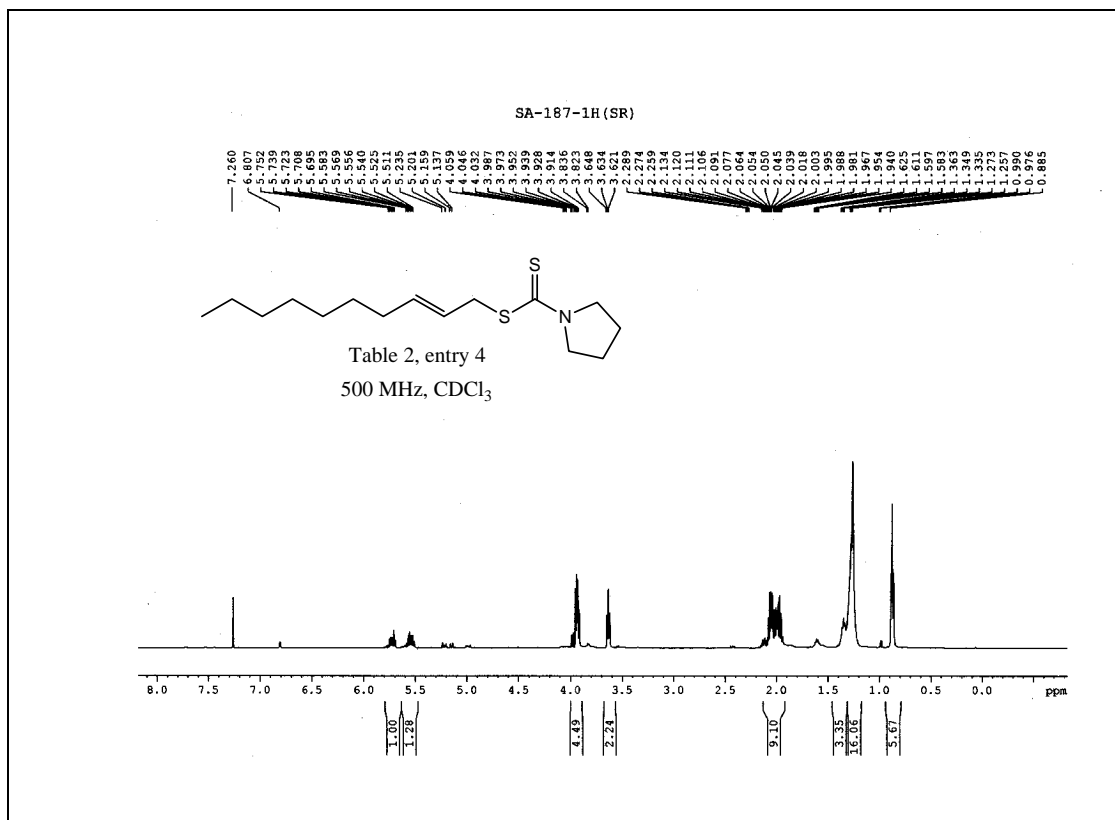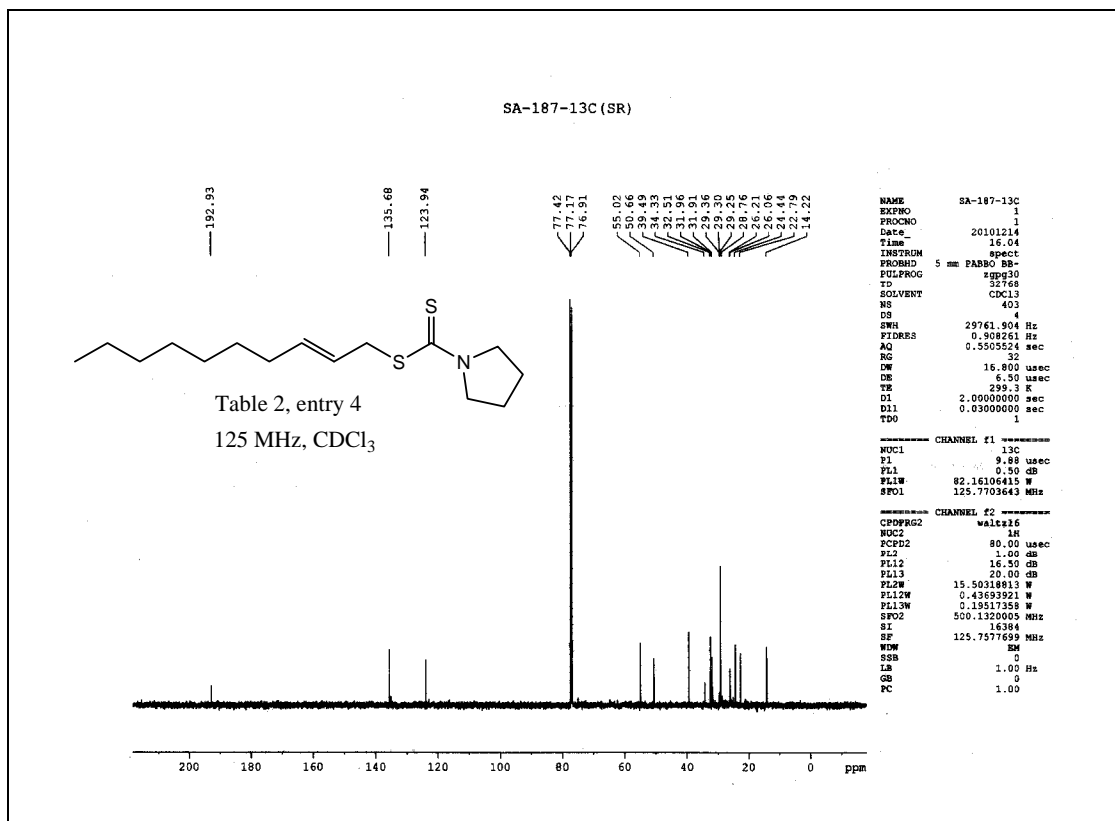

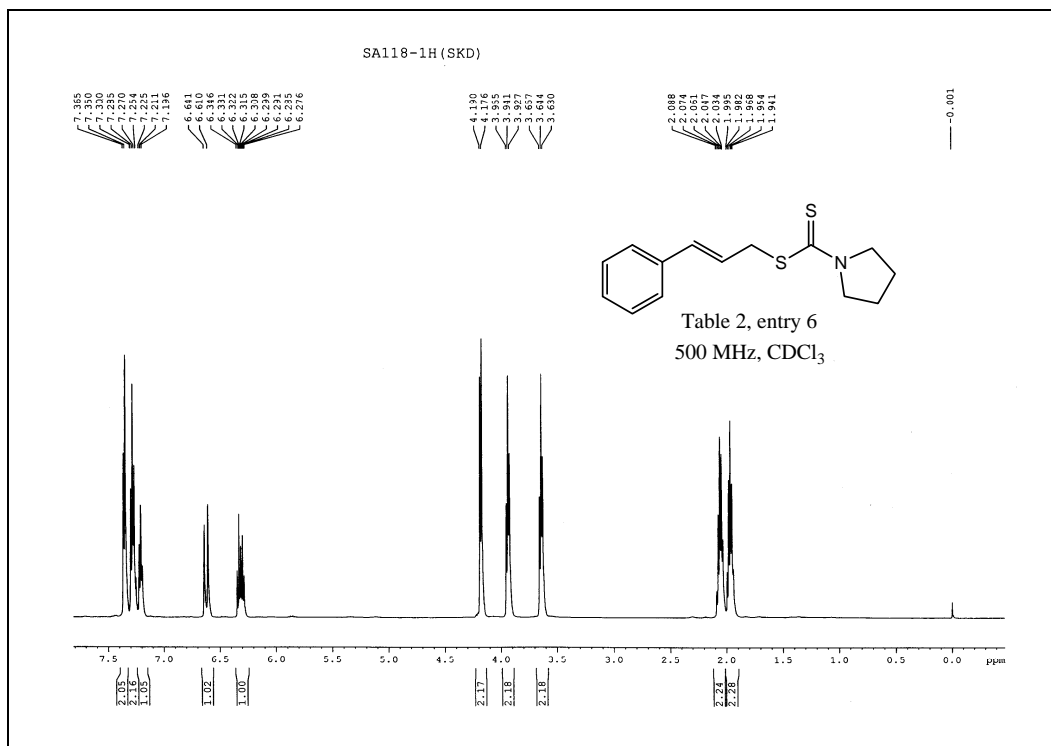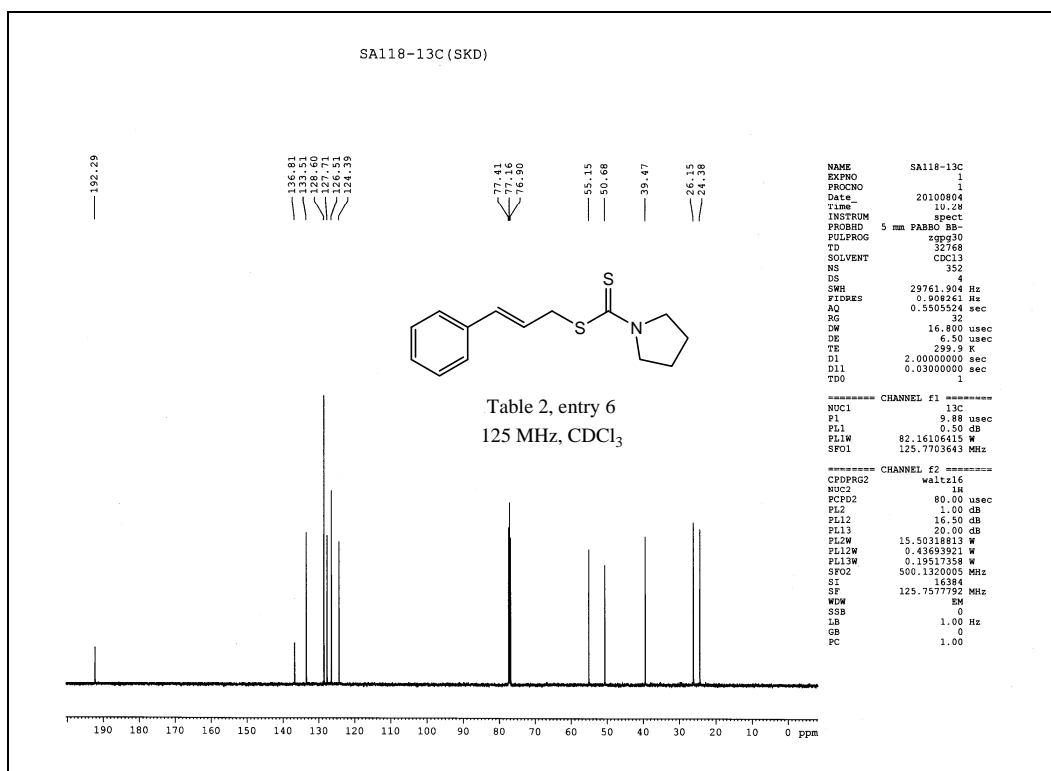

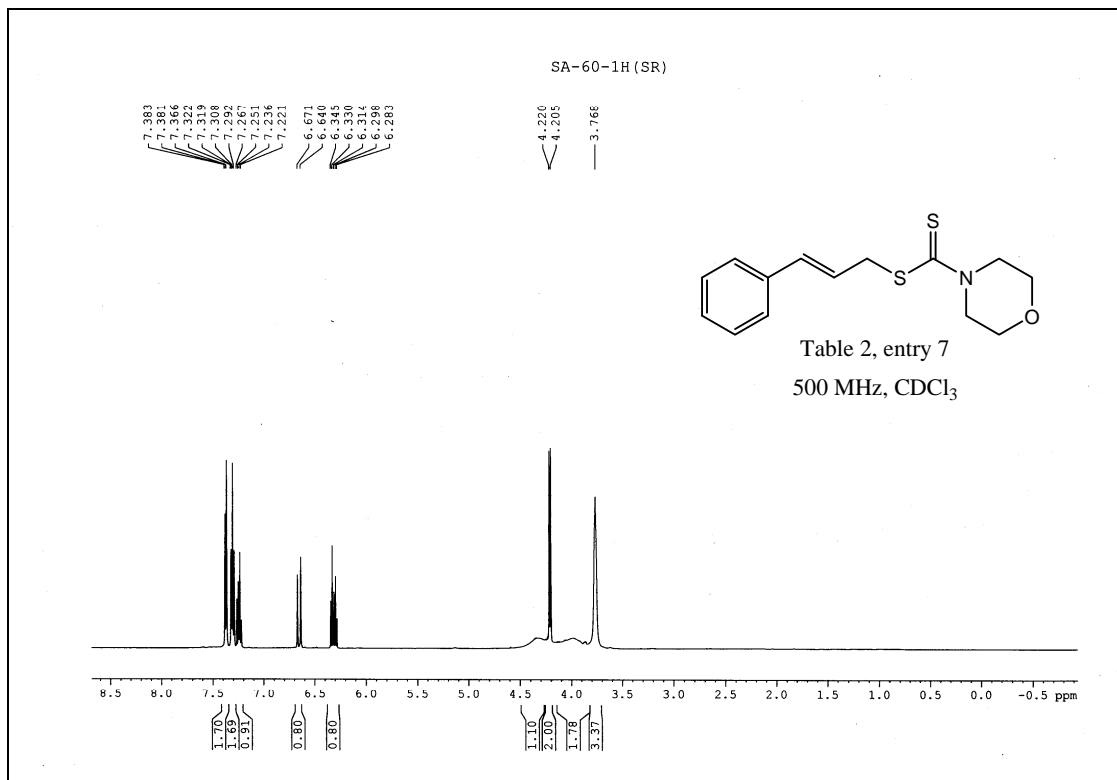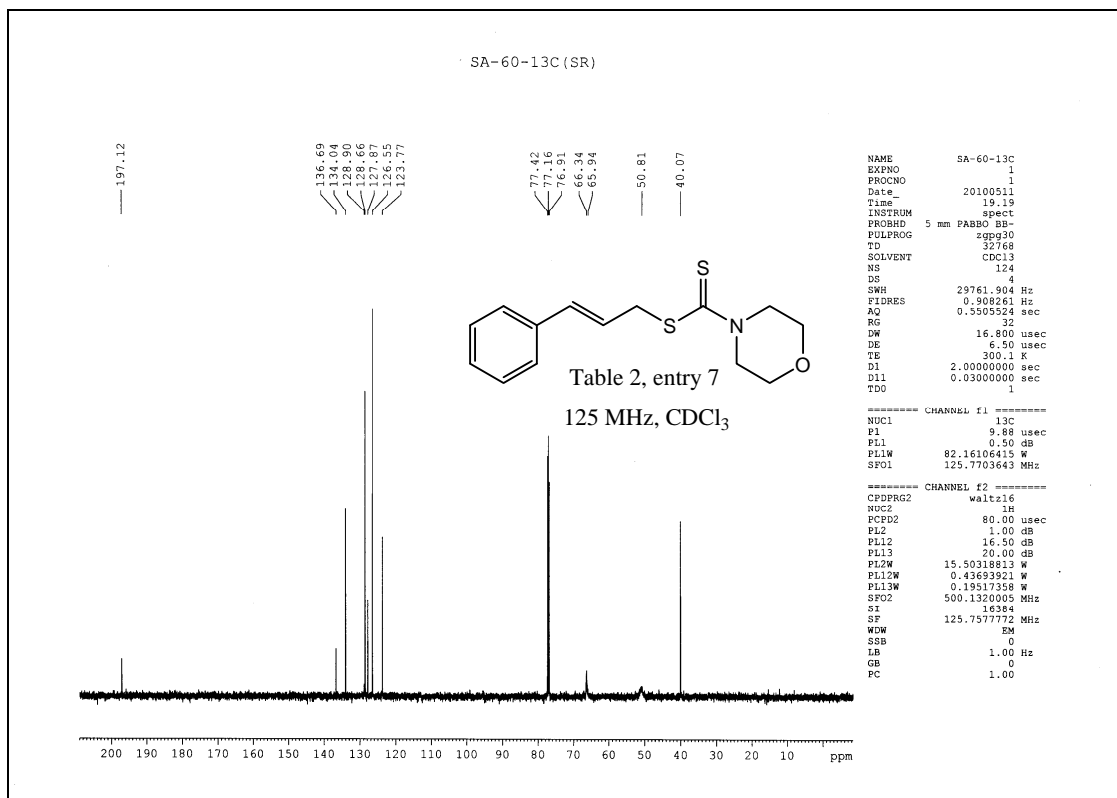

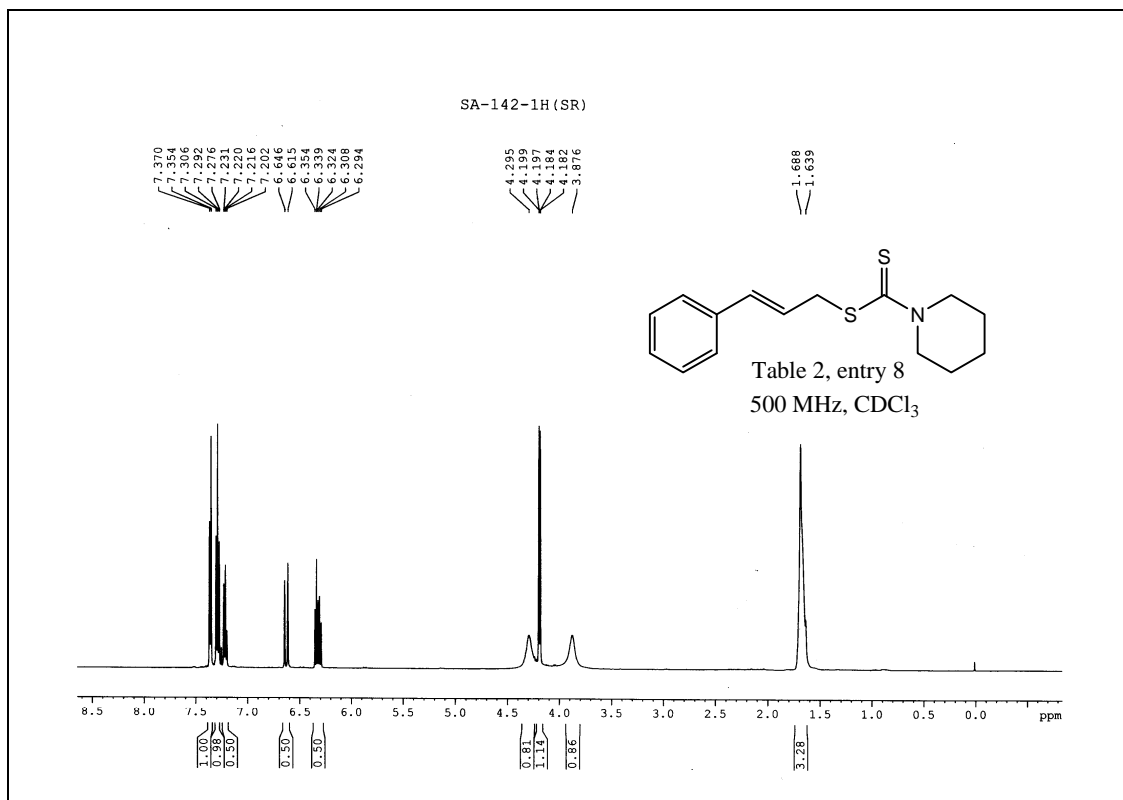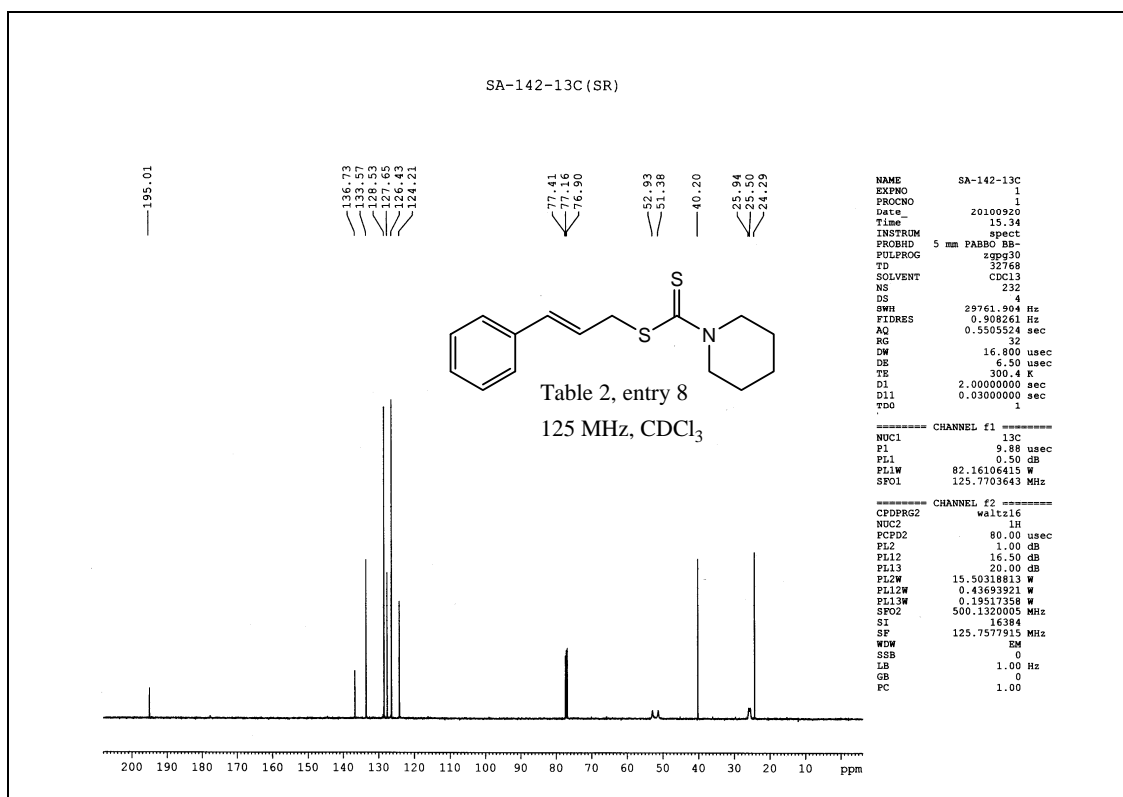



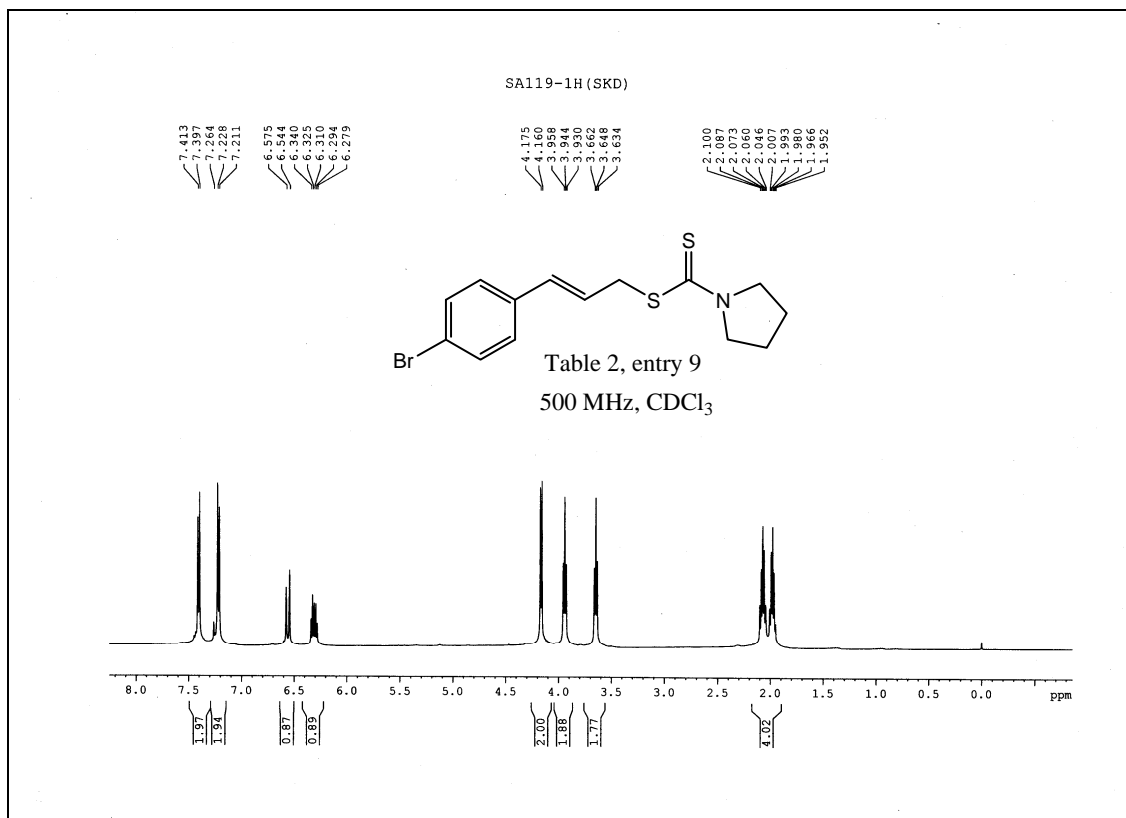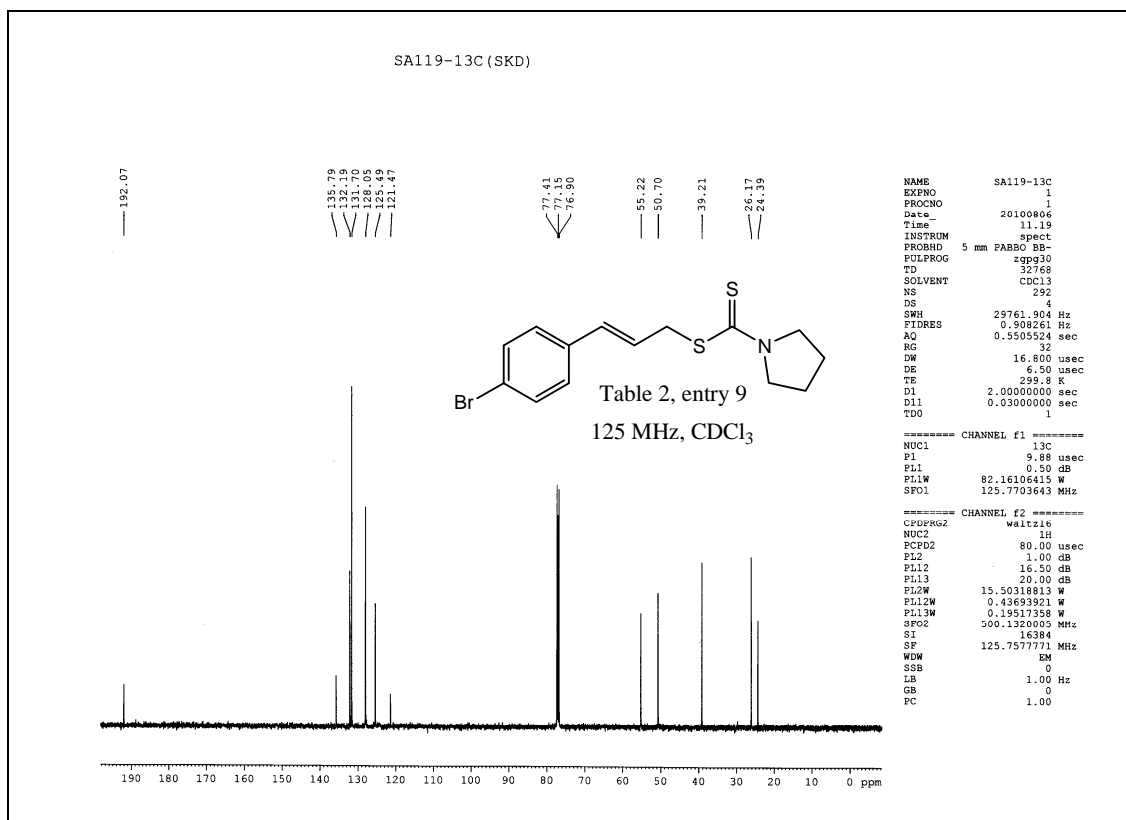

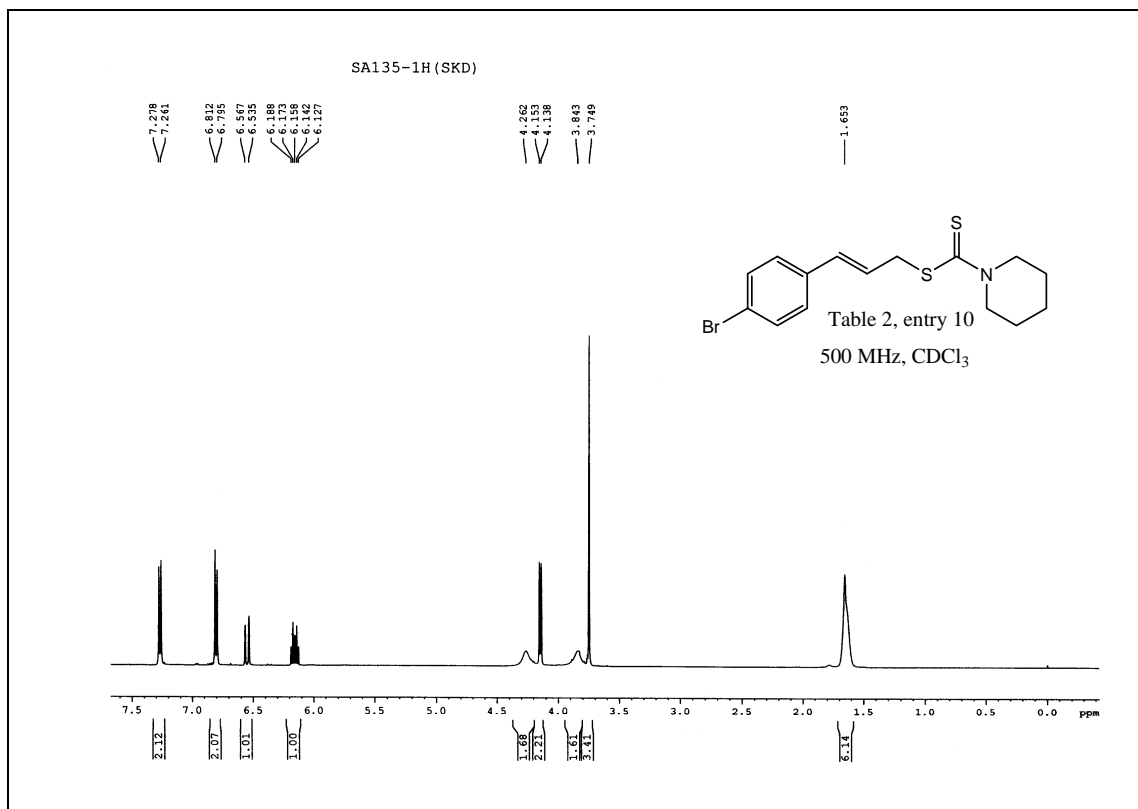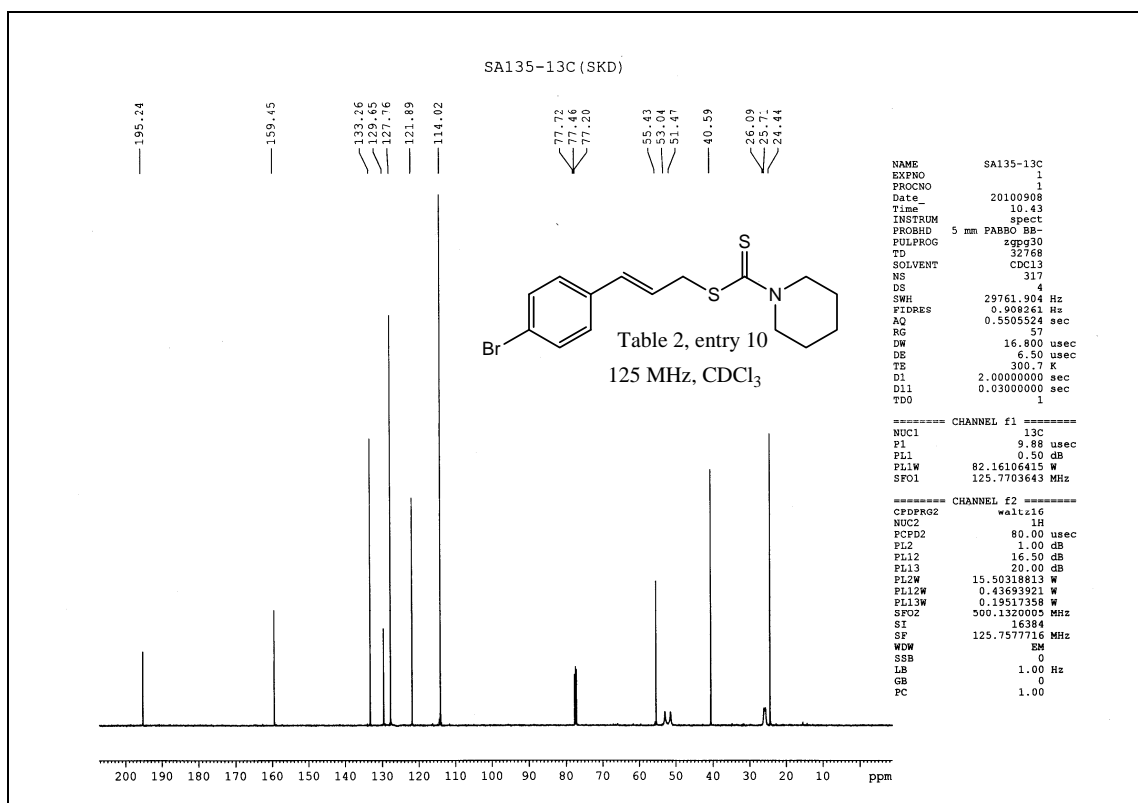

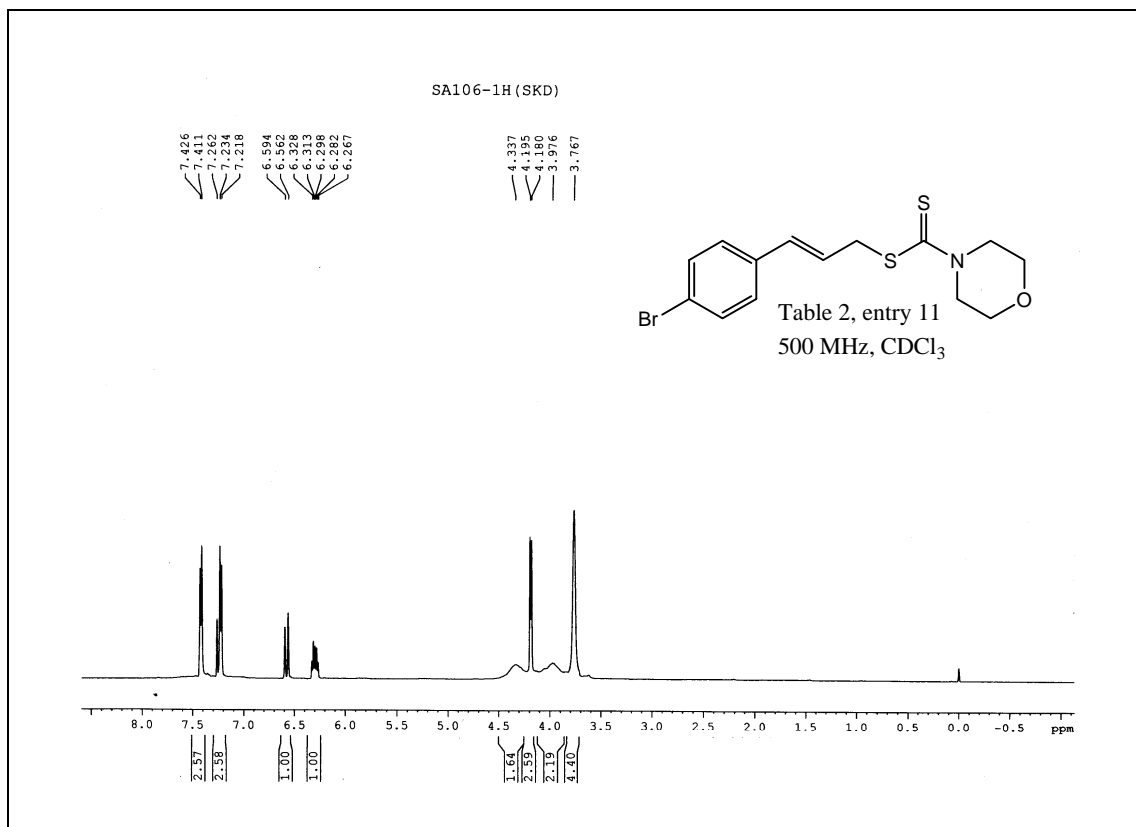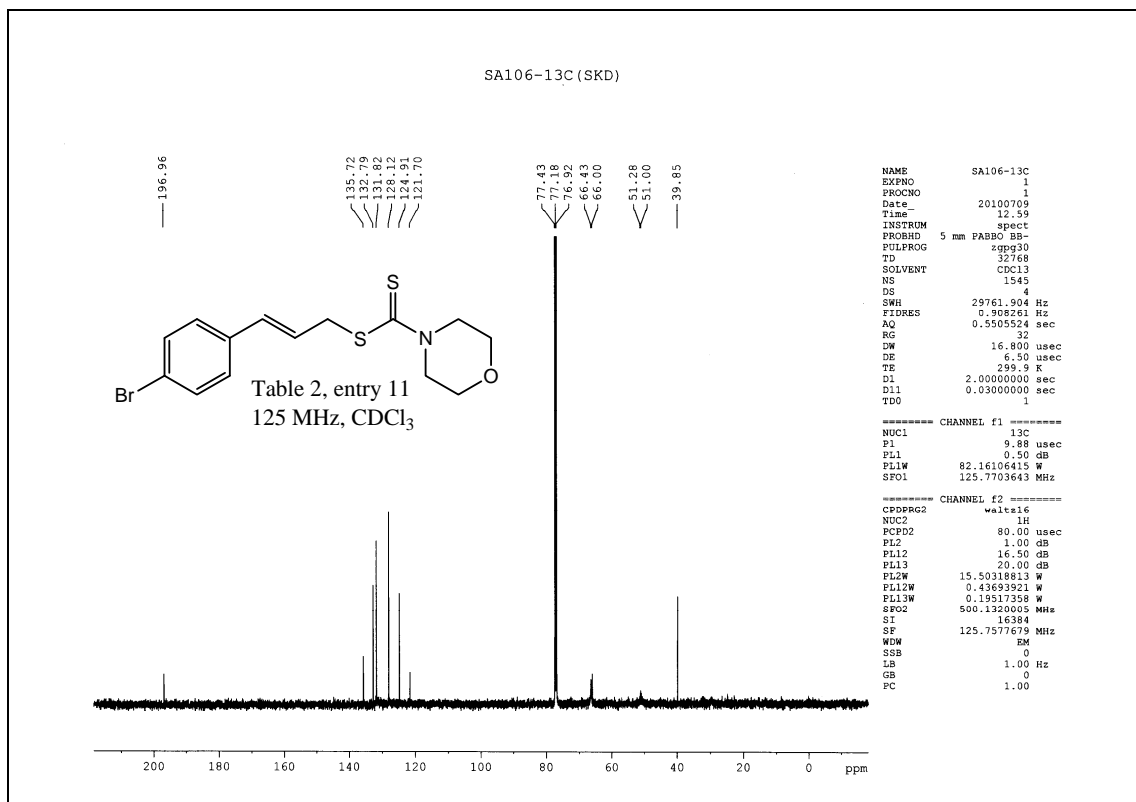

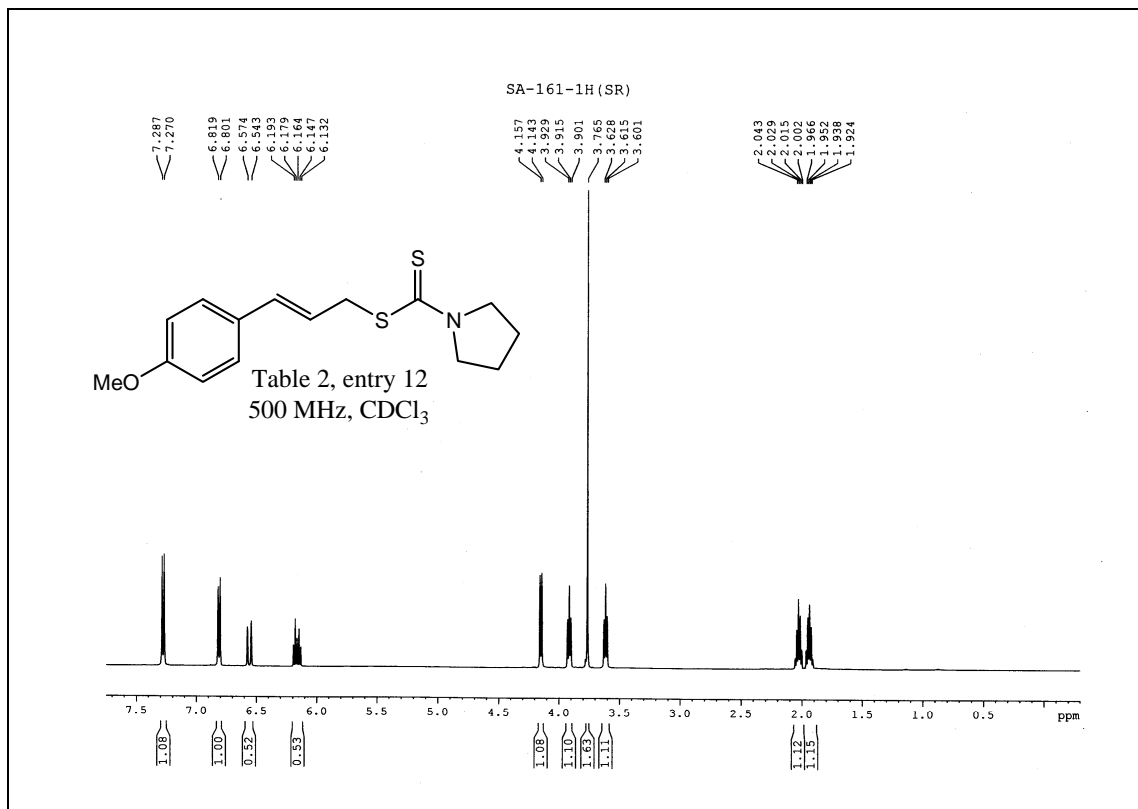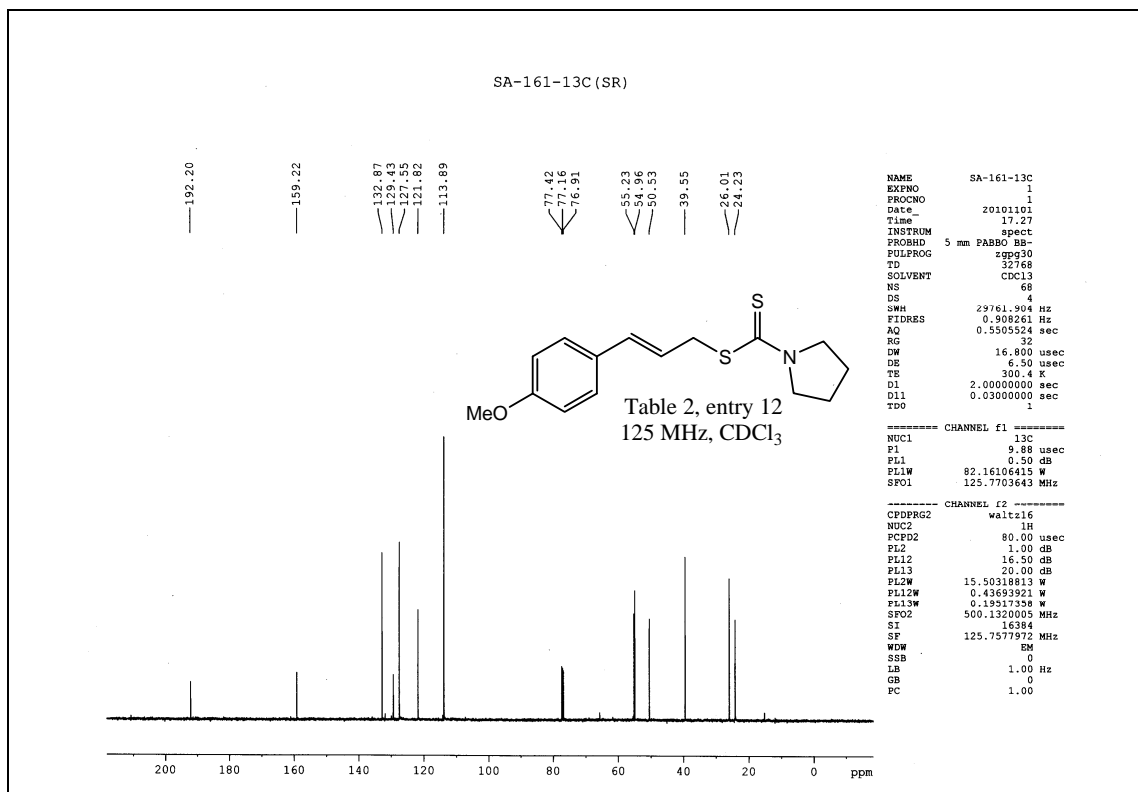

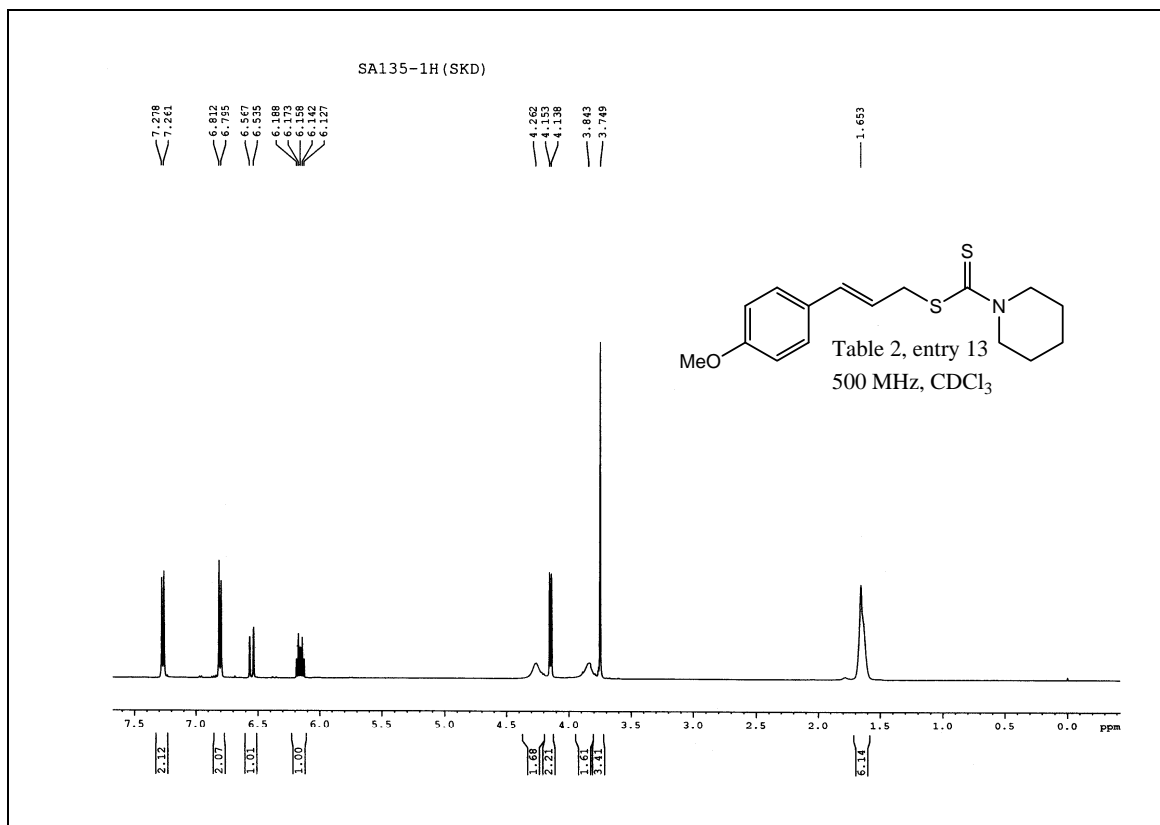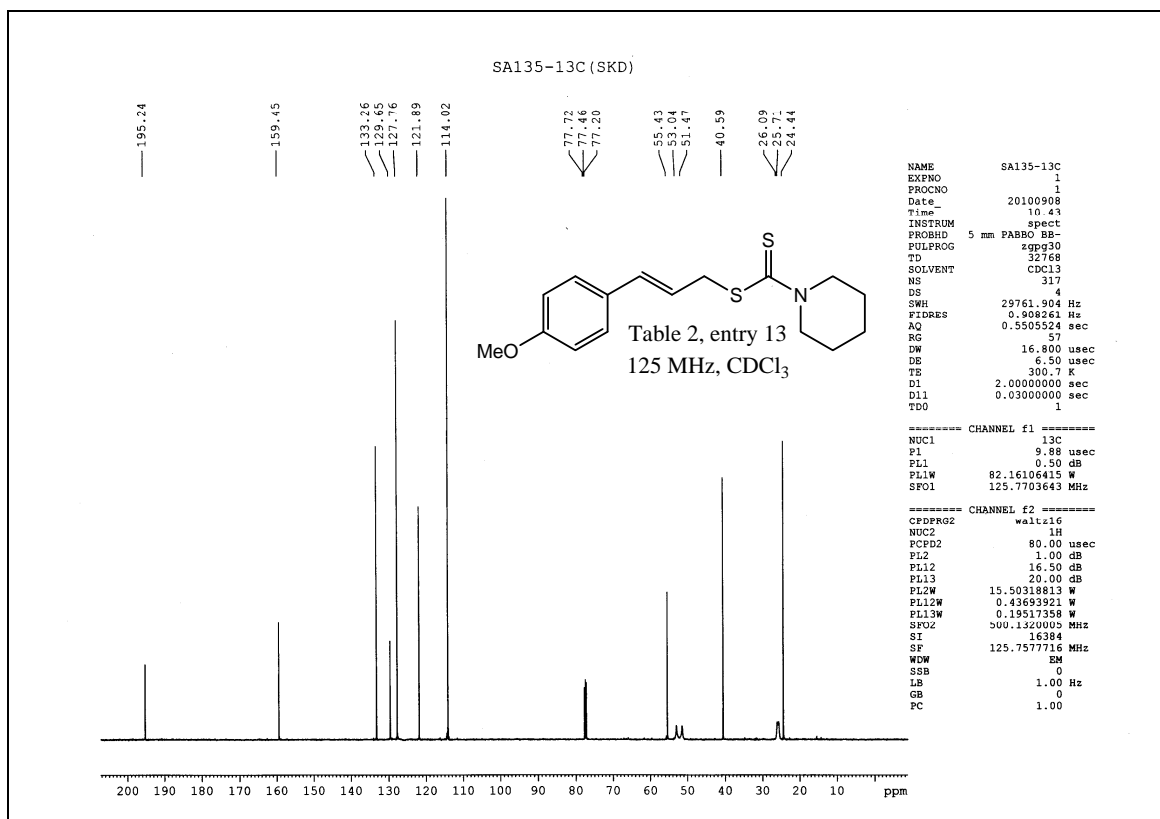

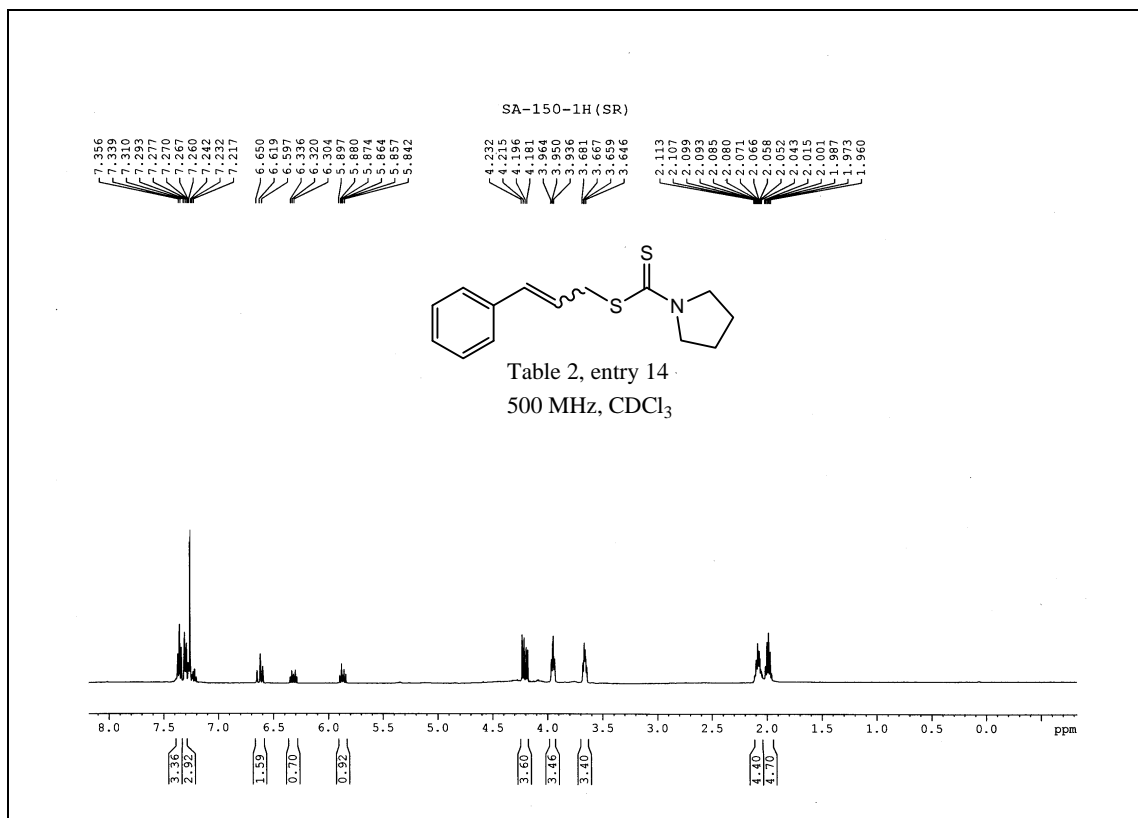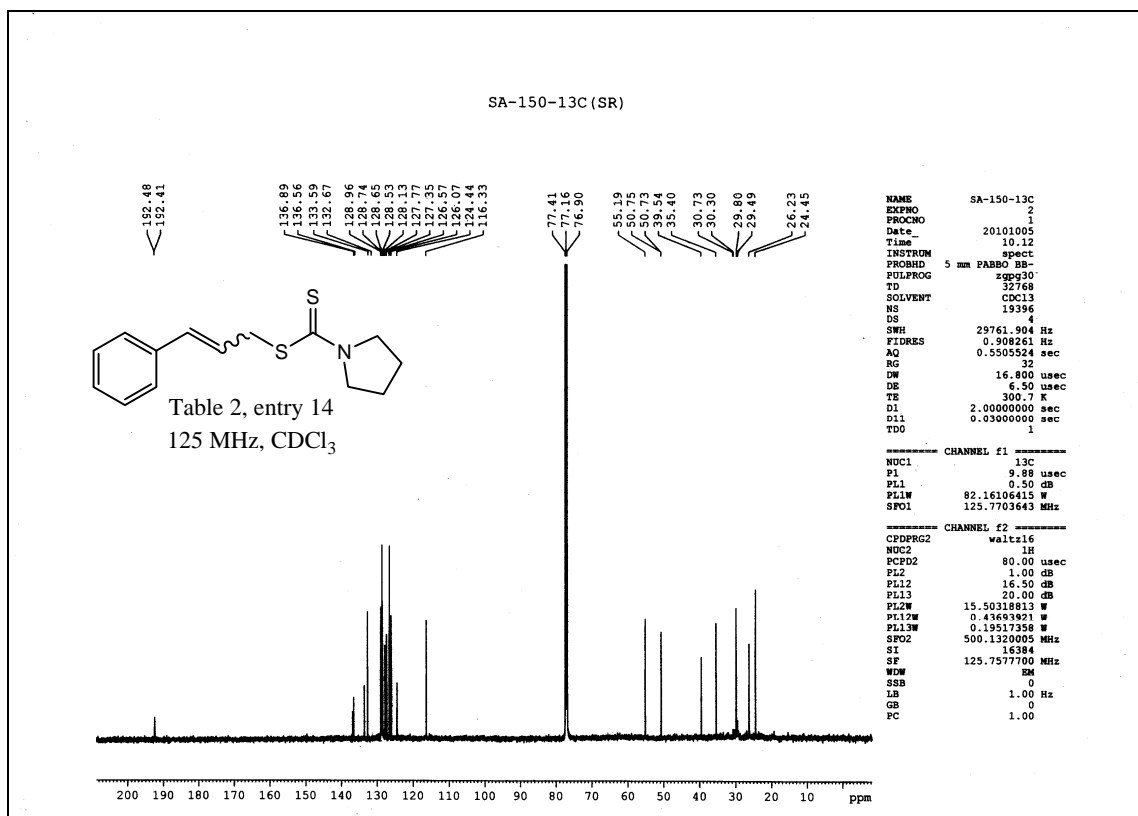

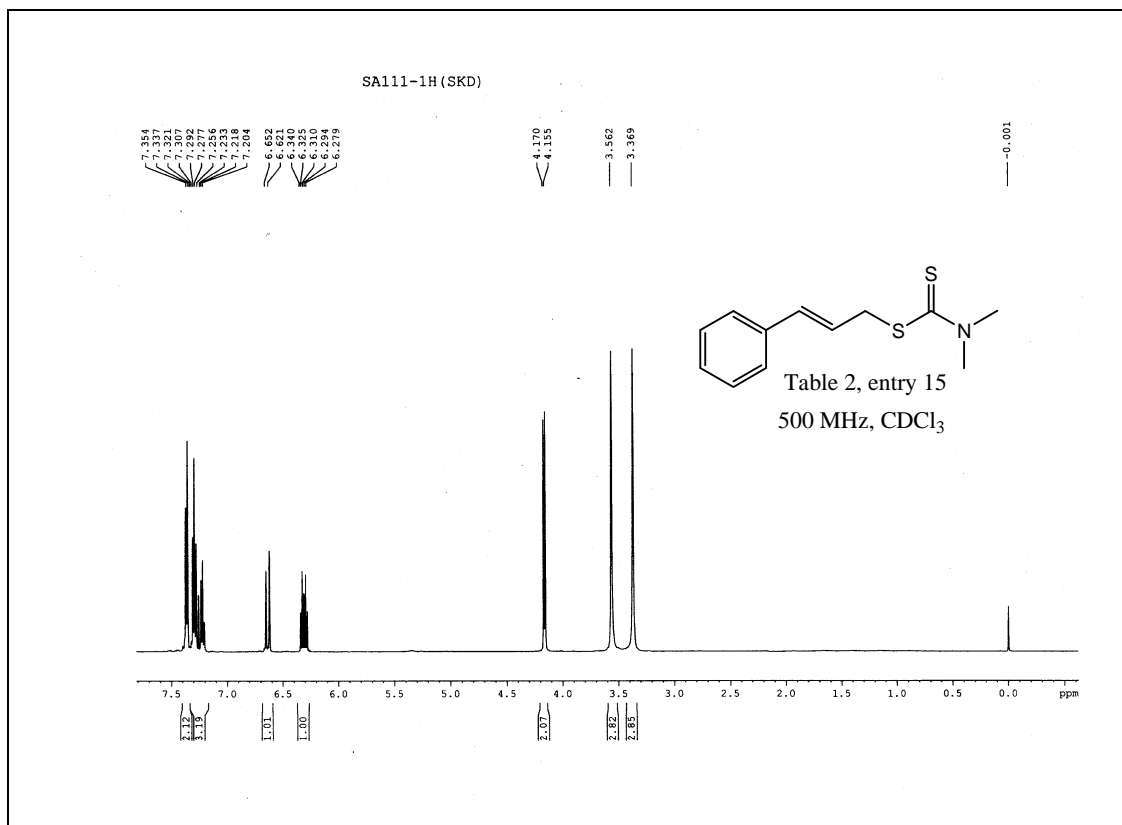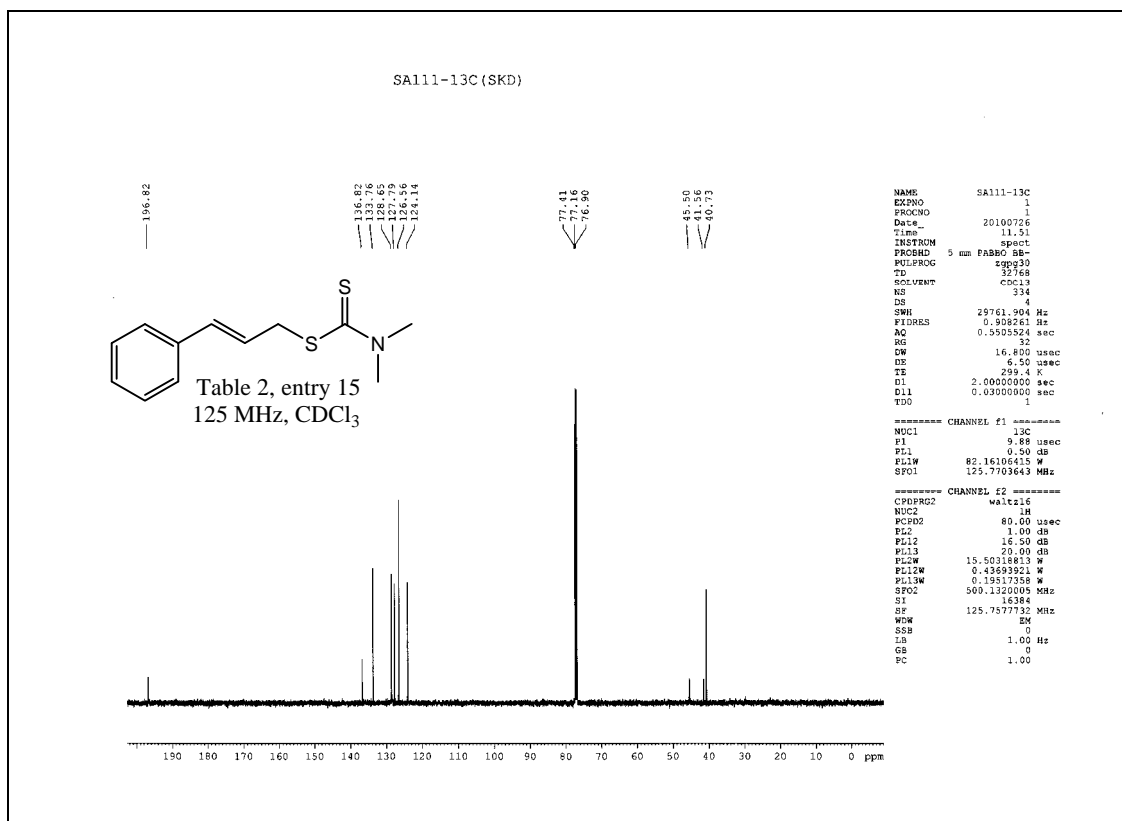

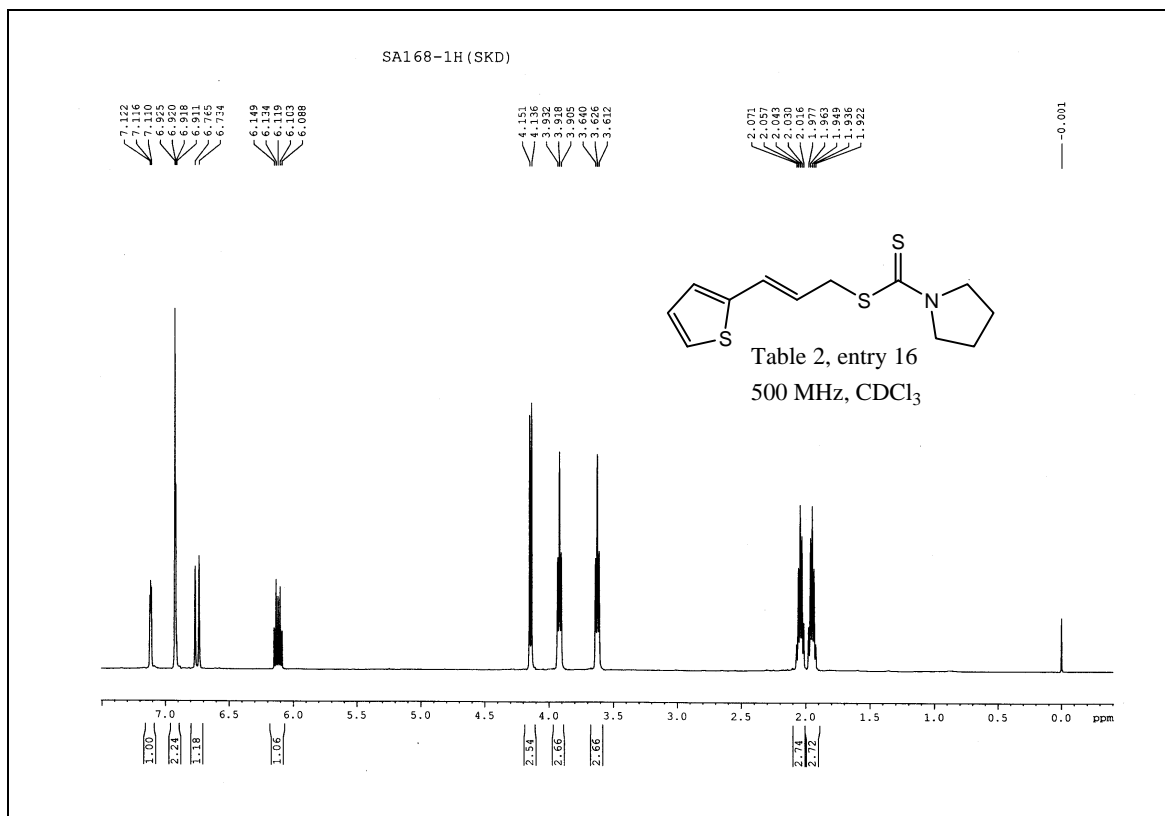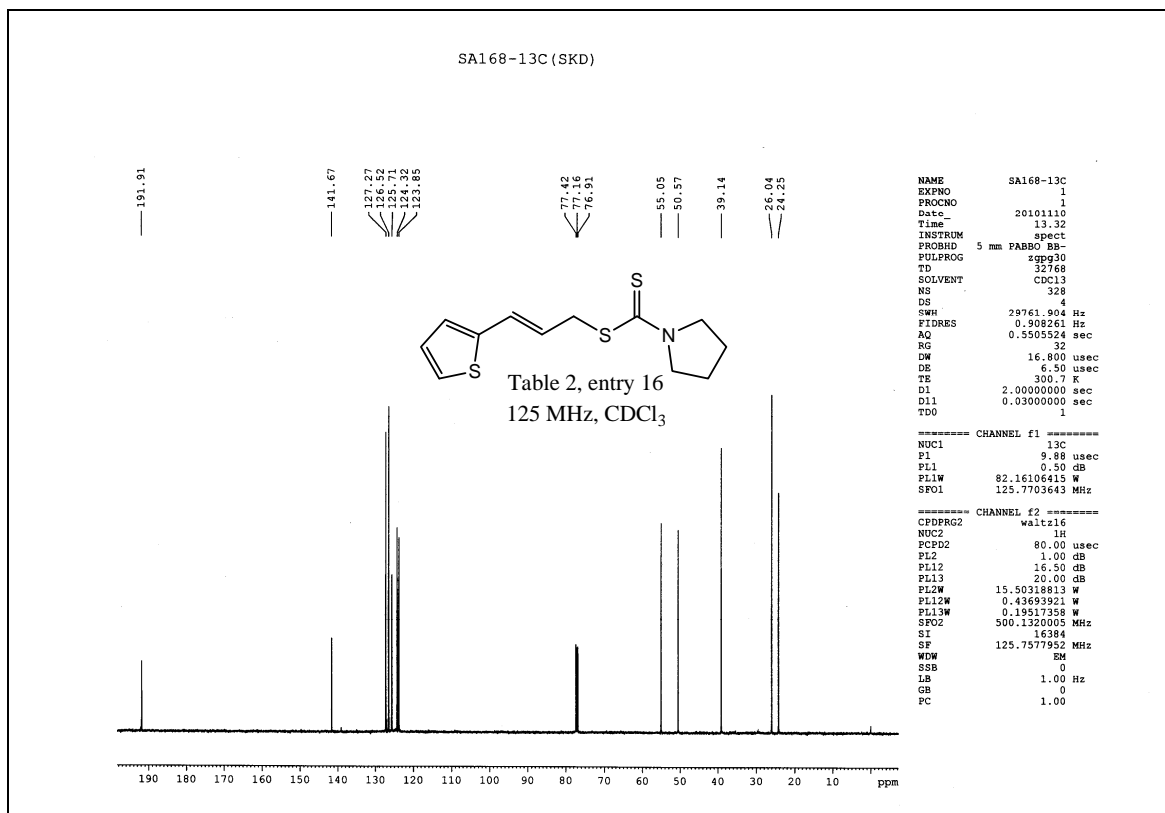



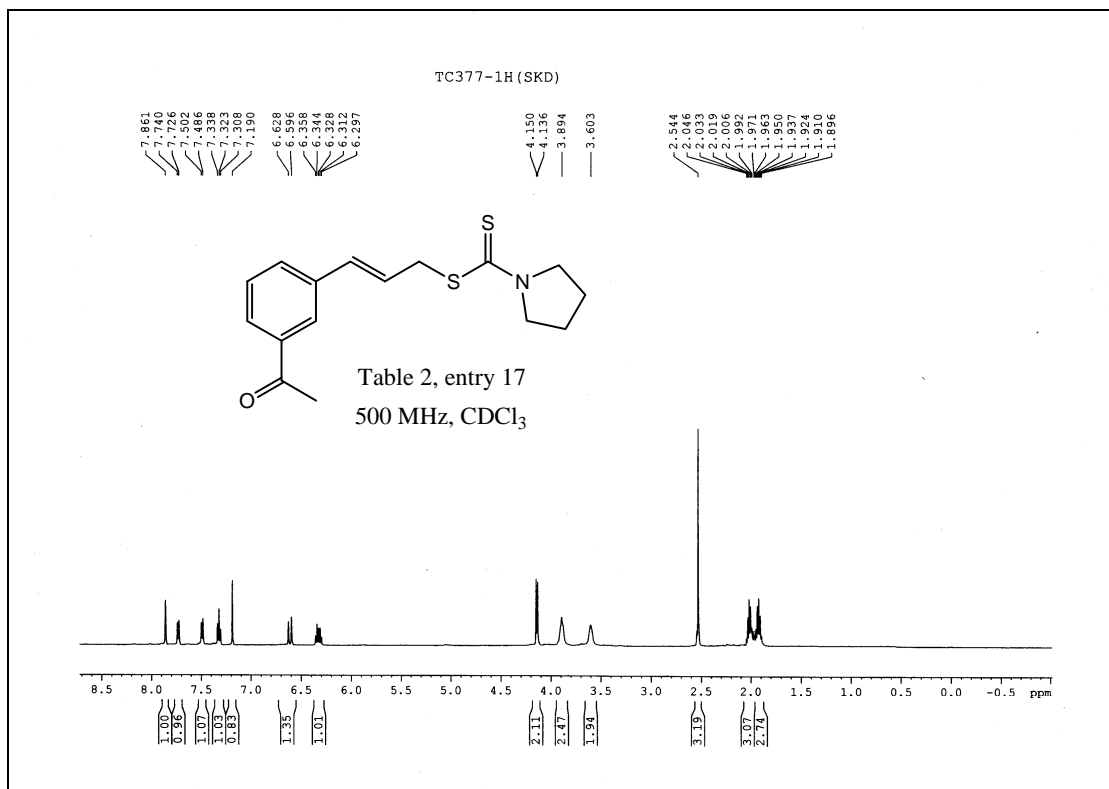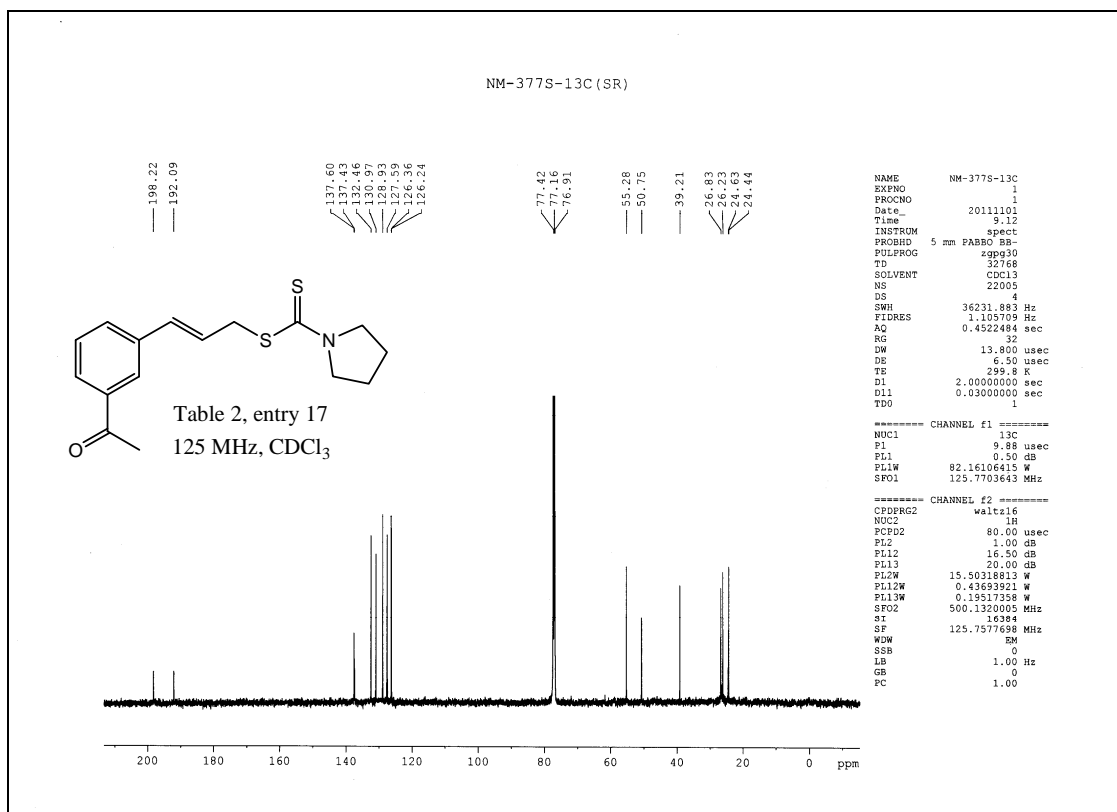

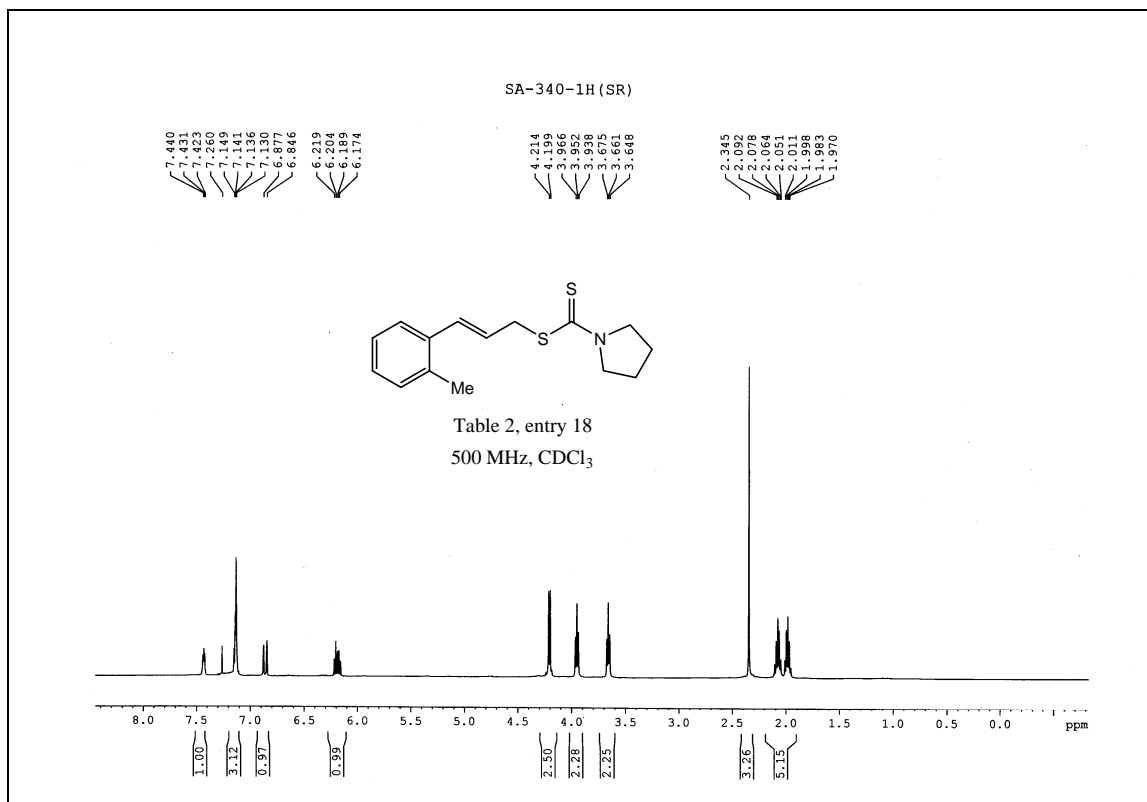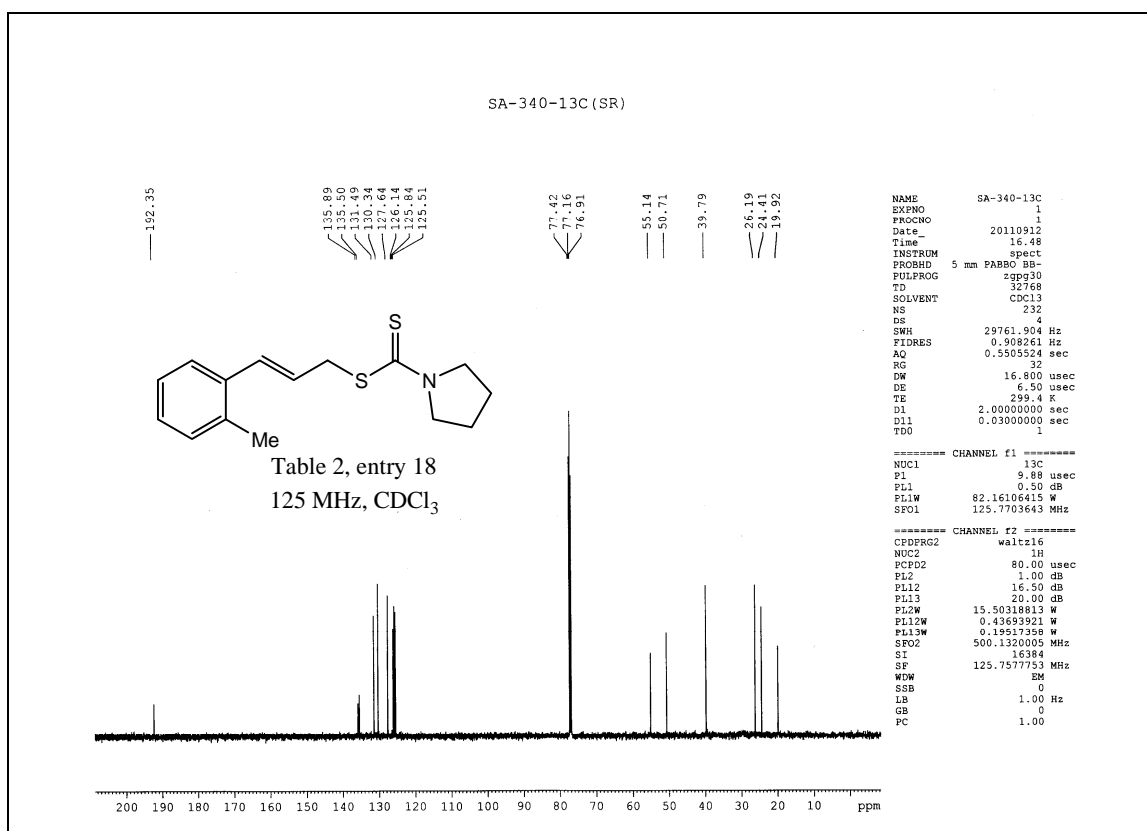

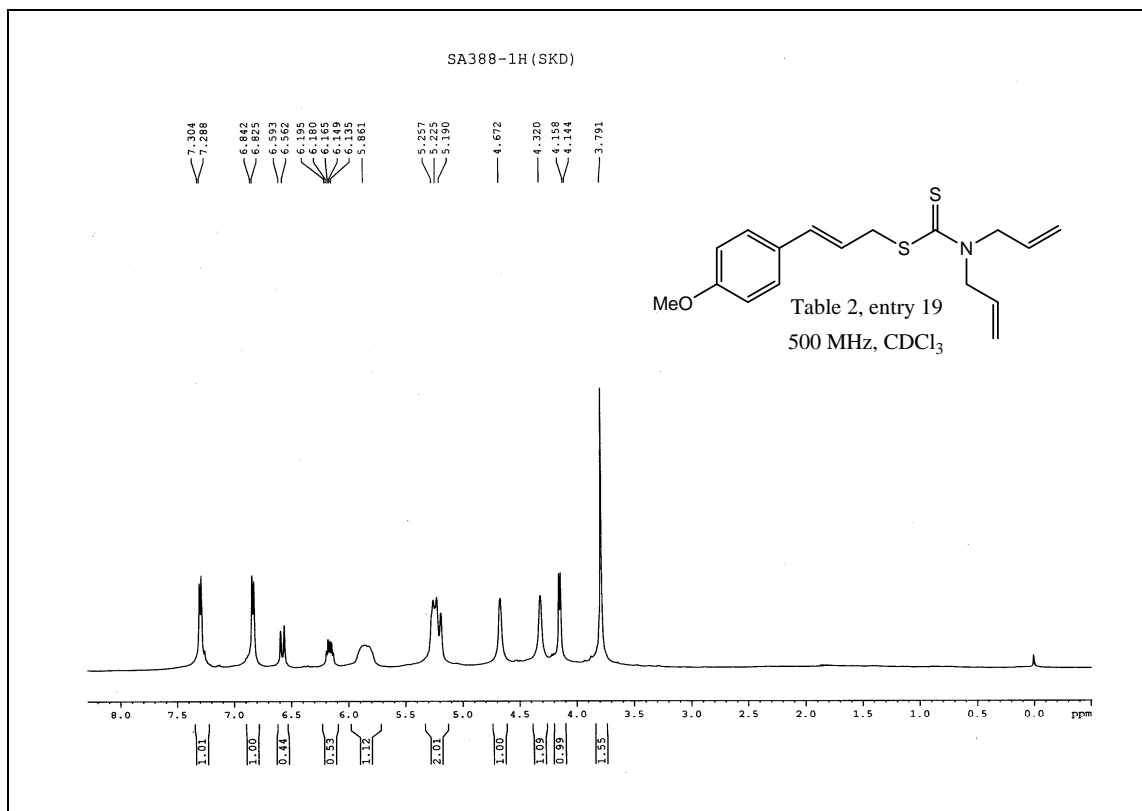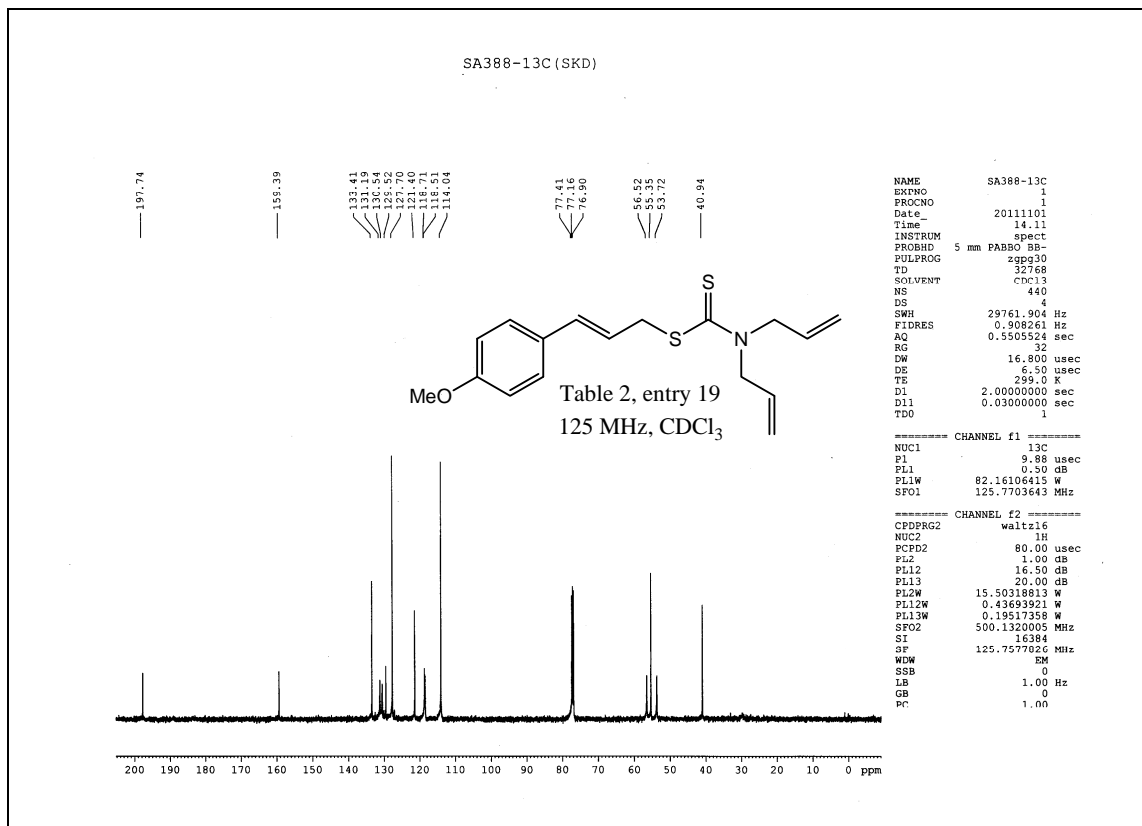

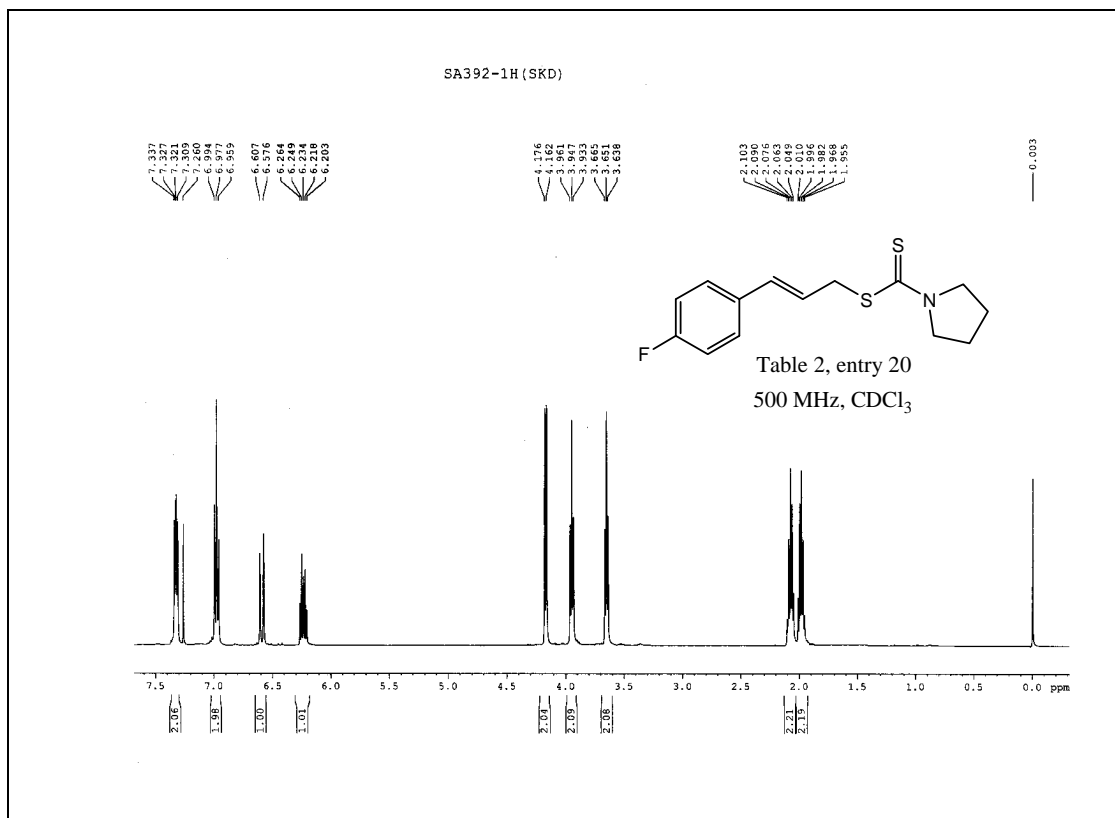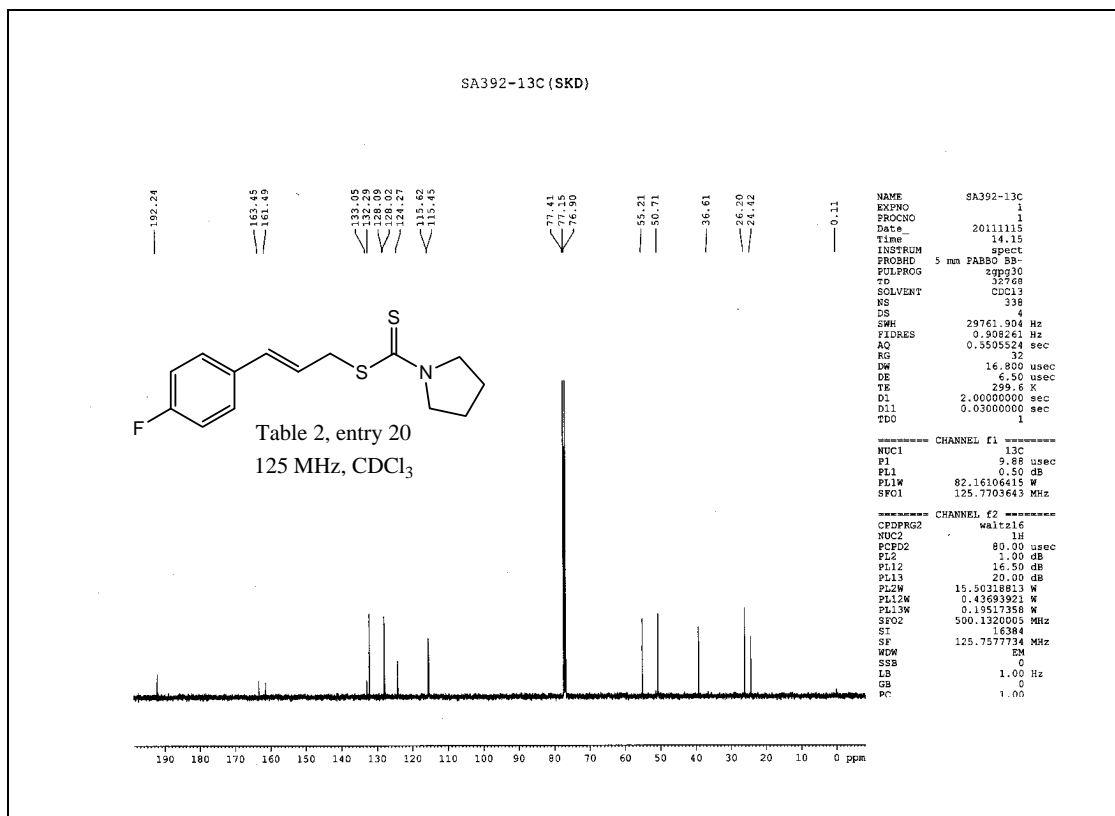

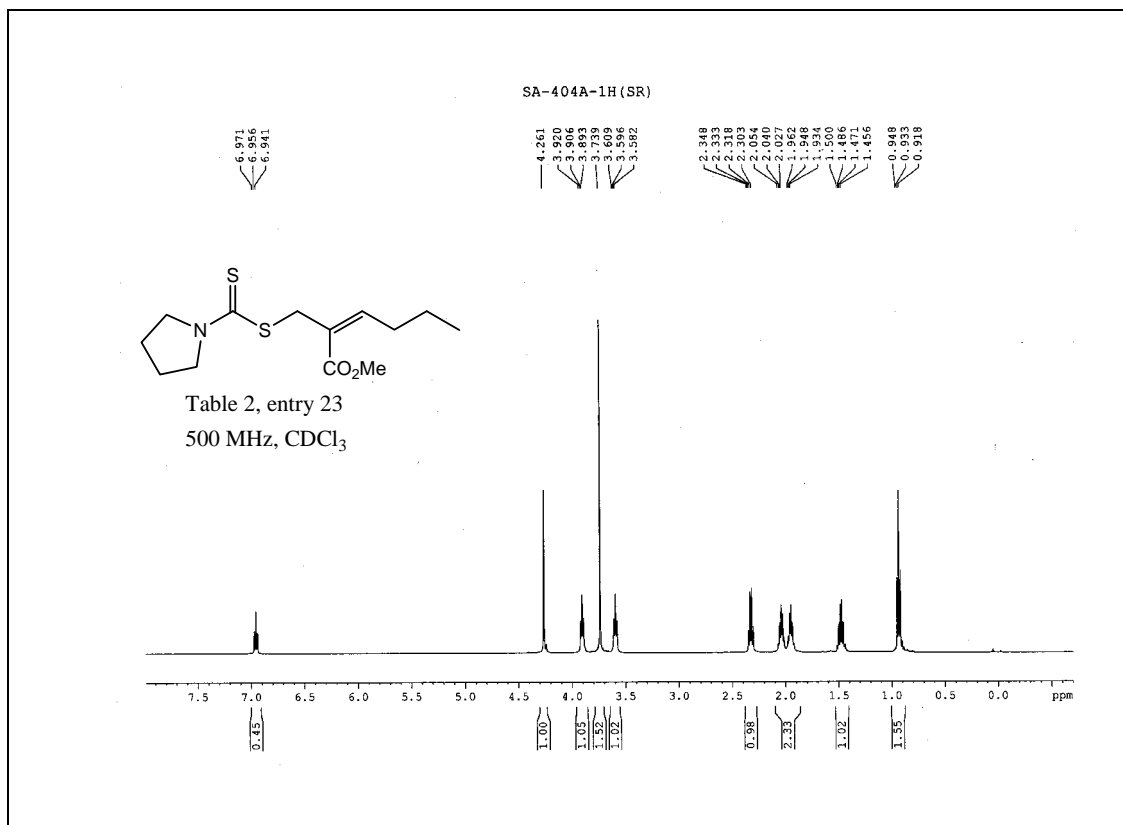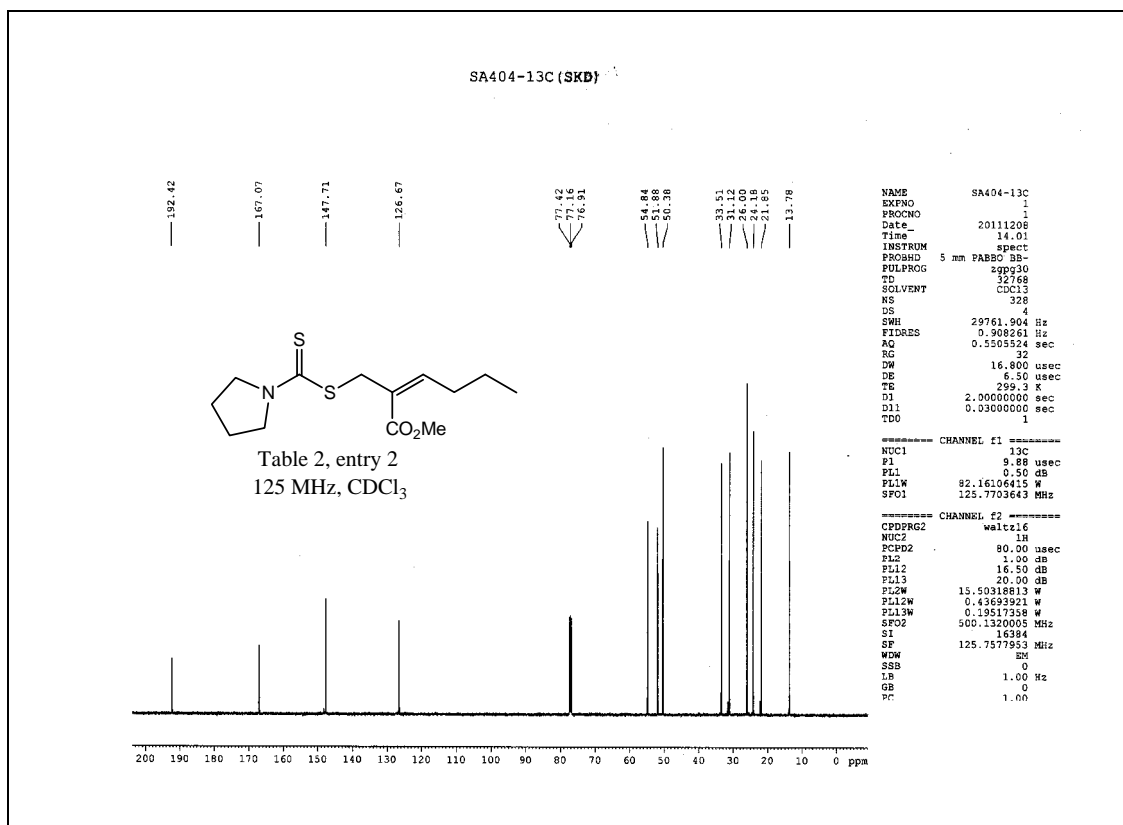

## 2. X-Ray Structure of 2p.

(*E*)-3-(Thiophen-2-yl)allyl pyrrolidine-1-carbodithioate, (Table 2, entry 16). (The CCDC deposition number: CCDC 861311).

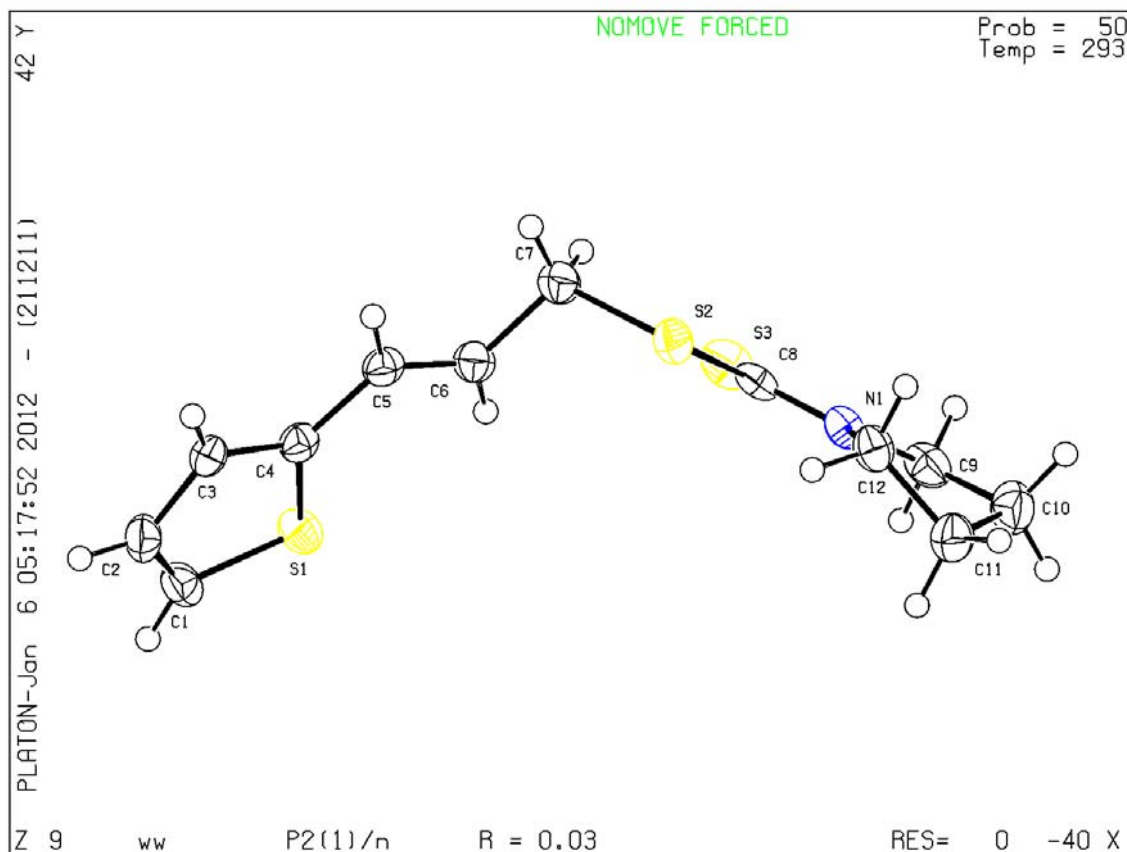

|                 |                         |                               |                           |
|-----------------|-------------------------|-------------------------------|---------------------------|
| Bond precision: | C-C = 0.0024 Å          | Wavelength=0.71073            |                           |
| Cell:           | a=7.7884(5)<br>alpha=90 | b=5.9160(4)<br>beta=95.261(1) | c=28.2073(19)<br>gamma=90 |
| Temperature:    | 293 K                   |                               |                           |
|                 | Calculated              | Reported                      |                           |
| Volume          | 1294.21(15)             | 1294.21(15)                   |                           |
| Space group     | P 21/n P2(1)/n          |                               |                           |
| Hall group      | -P 2yn                  | ?                             |                           |
| Moiety formula  | C12 H15 N S3            | ?                             |                           |
| Sum formula     | C12 H15 N S3            | C12 H15 N S3                  |                           |
| Mr              | 269.46                  | 269.43                        |                           |

|                        |             |             |
|------------------------|-------------|-------------|
| Dx, g cm <sup>-3</sup> | 1.383       | 1.383       |
| Z                      | 4           | 4           |
| Mu (mm <sup>-1</sup> ) | 0.545       | 0.545       |
| F000                   | 568.0       | 568.0       |
| F000'                  | 569.61      |             |
| h,k,lmax               | 9,7,33      | 9,7,33      |
| Nref                   | 2272        | 2272        |
| Tmin,Tmax              | 0.907,0.947 | 0.908,0.947 |
| Tmin'                  | 0.907       |             |

Correction method= MULTI-SCAN

Data completeness= 1.000                      Theta(max)= 25.000

R(reflections)= 0.0280( 2032)                      wR2(reflections)= 0.0743( 2272)

S = 1.069                                              Npar= 145

The following ALERTS were generated. Each ALERT has the format

**test-name\_ALERT\_alert-type\_alert-level.**

Click on the hyperlinks for more details of the test.

#### **Alert level G**

PLAT005\_ALERT\_5\_G No \_iucr\_refine\_instructions\_details in CIF .... ?

PLAT128\_ALERT\_4\_G Alternate Setting of Space-group P21/c ..... P21/n

PLAT199\_ALERT\_1\_G Check the Reported \_cell\_measurement\_temperature 293 K

PLAT200\_ALERT\_1\_G Check the Reported \_diffn\_ambient\_temperature 293 K

0 **ALERT level A** = Most likely a serious problem - resolve or explain

0 **ALERT level B** = A potentially serious problem, consider carefully

0 **ALERT level C** = Check. Ensure it is not caused by an omission or oversight

4 **ALERT level G** = General information/check it is not something unexpected

2 ALERT type 1 CIF construction/syntax error, inconsistent or missing data

0 ALERT type 2 Indicator that the structure model may be wrong or deficient

0 ALERT type 3 Indicator that the structure quality may be low

1 ALERT type 4 Improvement, methodology, query or suggestion

1 ALERT type 5 Informative message, check
